# Supplementary material for: Oxidative Stress and Chemoradiation-Induced Oral Mucositis: A Scoping Review of In Vitro, In Vivo and Clinical Studies
Source: MDPI journal article supplement (doi:10.3390/ijms23094863), 2022-04-27
Supplement: s1 [file s1]

## Supplementary Materials

### In Vitro Studies

Supplementary Table S1. Summary of in vitro study design and results.

| AUTHOR, YEAR                         | POPULATION                                                                                                                                        | INTERVENTION                                                                                                                                                | COMPARATOR                                   | OUTCOME                                                                      | EFFECT OBSERVED                                                                      | MECHANISM OF ACTION                                                                     |
|--------------------------------------|---------------------------------------------------------------------------------------------------------------------------------------------------|-------------------------------------------------------------------------------------------------------------------------------------------------------------|----------------------------------------------|------------------------------------------------------------------------------|--------------------------------------------------------------------------------------|-----------------------------------------------------------------------------------------|
| Osaki et al., 1994 [6]               | Sheep red blood cells (SRBC; $5 \times 10^6$ /ml)                                                                                                 | Incubated with various concentration of Azelastine (3,30,300ng/ml, 3, 30ug/ml)                                                                              | No Azelastine                                | Cell viability                                                               | Azelastine suppressed neutrophil respiratory burst in vitro $p < 0.05$ .             |                                                                                         |
| Greenberger et al., 2014 [7]         | Bone marrow cultures were established from Fancd2 <sup>-/-</sup> , Fancd2 <sup>+/-</sup> , and Fancd2 <sup>+/+</sup> mice (C57BL/6J mouse strain) | GS-nitroxide, JP4-039 added 1 hr biradiated to doses between 0 and 800 cGy before or immediately after irradiation, maintained in culture plate for 7 days. | No radiation                                 | DNA double stranded breaks, antioxidant                                      | Decreased production of hematopoietic cells by cultures over 22 weeks.               |                                                                                         |
| Yamaguchi et al., 2019 [8]           | Human dermal fibroblast cell line                                                                                                                 | Astaxanthin (5μM) treatment prior to cisplatin exposure                                                                                                     | Cisplatin with 0.05% dimethyl sulfoxide      | ROS production reduced, seen by flow cytometry                               | AST reduces damage from cisplatin, ROS generation. $p < 0.05$ .                      | AST is a strong ROS scavenger, inhibits UV-A effect on ROS directed signalling cascade. |
| Vaillancourt et al., 2021 [9]        | Oral keratinocyte cell line insulted by irinotecan                                                                                                | Green tea extract (polyphenol content $\geq 98\%$ , including 45 % EGCG) EGCG                                                                               | No intervention                              | ROS production by fluorometric assay                                         | Treatment led to reduced ROS production compared to untreated cells ( $p < 0.001$ ). | Polyphenols works as effective ROS scavenging agents.                                   |
| Iglesias-Bartolome et al., 2012 [10] | Irradiated normal oral keratinocyte cell culture                                                                                                  | Rapamycin                                                                                                                                                   | HN12 and Cal27 (+); untreated or vehicle (-) | Levels of ROS after radiation in NOK and HN12 cells with rapamycin treatment | Rapamycin increased the protein levels of MnSOD in NOKs.                             | Rapamycin increases MnSOD expression resulting protection from oxidative stress.        |

|                           |                                                                                        |                                                                                                            |                                                         |                                                                                                                    |                                                                                                                                                                                                                     |                                                                                                                                                                              |
|---------------------------|----------------------------------------------------------------------------------------|------------------------------------------------------------------------------------------------------------|---------------------------------------------------------|--------------------------------------------------------------------------------------------------------------------|---------------------------------------------------------------------------------------------------------------------------------------------------------------------------------------------------------------------|------------------------------------------------------------------------------------------------------------------------------------------------------------------------------|
| Baek et al., 2014 [11]    | Human keratinocyte (HaCaT) cells                                                       | 3-amino-3-(4-fluorophenyl)-1H-quinoline-2,4-dione (KR22332)                                                | HaCaT cells with radiation therapy only without KR22332 | Intracellular ROS generated by DCFDA                                                                               | KR22332 inhibits radiation-induced intracellular ROS generation $p < 0.05$ .                                                                                                                                        | KR22332 inhibits radiation-induced intracellular ROS generation.                                                                                                             |
| Chang et al., 2014 [12]   | Human keratinocyte (HaCaT) cells                                                       | Various concentration of Korean red ginseng (KRG)                                                          | No KRG                                                  | Intracellular ROS generation detected using flow cytometry with, DCFDA                                             | KRG significantly inhibited the intracellular ROS generation induced by irradiation $p < 0.01$ . NAC-QYD treatment in tissues led to preservation of their integrity and prevention of apoptosis. $p < 0.05$ .      | MMP and KRG decreased the level of ROS leading to prevention of radiation-induced apoptosis of HaCaT                                                                         |
| Lambros et al., 2014 [13] | Human buccal keratinocytes                                                             | 1 mM NAC, 5 mg/mL QYD, or an NAC-QYD mixture (1 mM NAC + 4.5 mg/mL QYD)                                    | Untreated 3D tissues                                    | Cell viability                                                                                                     |                                                                                                                                                                                                                     | Significant increase of metallothioneins, HMOX1, and other genes of the Nrf2 pathway, which protect cells against oxidative stress were seen in QYD-treated tissues.         |
| Maiguma et al., 2009 [14] | Normal human epidermal keratinocytes and normal human periodontal ligament fibroblasts | Amifostine and Cyclooxygenase-1 Inhibitor                                                                  | Control without chemical                                | Cell viability and superoxide radical activity                                                                     | Allopurinol was a superoxide radical scavenger, while amifostine was hydroxyl radical scavenger $p < 0.05$ . EC significantly reduced radiation-induced the generation of intracellular ROS generation $p < 0.01$ . | In concentration-dependent manner, amifostine have hydroxyl radical scavenging activity and weak superoxide radical scavenging activity.                                     |
| Shin et al., 2013 [15]    | Human keratinocyte line HaCaT                                                          | Pre-treated with various concentrations of Epicatechin (0–200 $\mu$ M) for 1 hr                            | No EC                                                   | ROS production - flow cytometry                                                                                    |                                                                                                                                                                                                                     |                                                                                                                                                                              |
| Tsubaki et al., 2018 [16] | Primary normal human oral keratinocytes (NHOK cells)                                   | Treated with rebamipide (0.01–0.5 mM) in combination with 5-FU (1–50 $\mu$ M) or cisplatin (0.5–5 $\mu$ M) | Rebamipide                                              | Effects of SB203580 and U0126 on rebamipide-induced cytoprotection in NHOK cells, number of dead cells was counted | LY294002 or rapamycin prevented rebamipide-induced Bcl-2 and Bcl-xL expressions, and decreased Bax and Bim expression $p < 0.01$ .                                                                                  | Rebamipide activates Akt and mTOR. By suppressing growth arrest DNA damage-induced 45 $\alpha$ expression, ROS-mediated mitochondrial damage, and caspase activation in RGM1 |

|                           |                                                                                                          |                                                                                                                                                                                                                                                         |                                                |                                                         |                                                                                                 |                                                                                                                                                             |
|---------------------------|----------------------------------------------------------------------------------------------------------|---------------------------------------------------------------------------------------------------------------------------------------------------------------------------------------------------------------------------------------------------------|------------------------------------------------|---------------------------------------------------------|-------------------------------------------------------------------------------------------------|-------------------------------------------------------------------------------------------------------------------------------------------------------------|
| Kim et al., 2020 [17]     | Human immortalized keratinocytes, HaCaT cells                                                            | Pre-treatment with NAC (10 mM) for a 1 hour before 10 minutes of radiation with 6 MV LINAC                                                                                                                                                              |                                                | ROS production                                          | Radiotherapy-induced ROS generation was significantly reduced by NAC $p < 0.05$ .               | cells, rebamipide prevents indomethacin-induced apoptosis<br>NAC treatment prevents radiation-induced mucositis by decreasing NRF2-dependent ROS synthesis. |
| Takano et. al, 2014 [18]  | RT7, an immortalized human oral keratinocyte cell line                                                   | $\gamma$ -tocotrienol 10nM                                                                                                                                                                                                                              | No $\gamma$ -tocotrienol                       | Measurement of ROS, Expression of HO-1 (heme oxygenase) | $\gamma$ -tocotrienol could prevent 5-FU-induced ROS generation $p < 0.01$ .                    | $\gamma$ -tocotrienol led to stabilization of Nrf2 activation, which led to ROS detoxification and high cell survival rate.                                 |
| Cirillo et al., 2015 [19] | Normal human oral fibroblasts (NHOF), Keratinocytes                                                      | Keratinocytes treated with H <sub>2</sub> O <sub>2</sub> or TGF- $\beta$ , with or without Mucosamin (hyaluronic acid-based compound)<br>Exposed 100 ng/mL LPS for 15 minutes or not and then exposed to photomodulation at either 970 nm 800nm, 660 nm | No Mucosamin, no H <sub>2</sub> O <sub>2</sub> | Cell viability                                          | Mucosamin1showed a protective effect oxidative stress-induced senescence.                       | Binding of high molecular mass HA to free radicals catalyses the breakdown of HA into smaller fragments and thus inactivates ROS.                           |
| Rupel et al., 2018 [20]   | Human keratinocytes (HaCaT)                                                                              |                                                                                                                                                                                                                                                         | No LPS, No PBM                                 | Intracellular ROS Production and Kinetics in PMN        | Both 970 nm protocol and the 800 nm protocol led to significant ROS reduction.                  |                                                                                                                                                             |
| Chung et al., 2009 [21]   | IMR90 cells, derived from normal human embryonic fibroblasts                                             | Treatment with 1 mM phenylbutyrate for 24 h                                                                                                                                                                                                             | No phenylbutyrate                              | DNA damage repair and cell survival                     | Phenylbutyrate induced histone H3 hyperacetylation in the normal human fibroblasts $p < 0.01$ . | HDAC inhibitor phenylbutyrate remodels chromatin structure leading to double-strand damage repair.                                                          |
| Huth et al., 2020 [22]    | Normal human dermal fibroblasts (NHDF) and normal human epidermal keratinocytes (NHEK) as well as normal | Treated with expanthenol-containing ointment (DCO)                                                                                                                                                                                                      | Placebo-treated and untreated controls         | ROS production                                          | Addition of calcium pantothenate led to significant reduction in ROS production.                |                                                                                                                                                             |

|                           |                                                                                        |                                                                                                                   |                                                                                                                                 |                              |                                                                                                                                                                                                                                                          |                                                                                                                                                         |
|---------------------------|----------------------------------------------------------------------------------------|-------------------------------------------------------------------------------------------------------------------|---------------------------------------------------------------------------------------------------------------------------------|------------------------------|----------------------------------------------------------------------------------------------------------------------------------------------------------------------------------------------------------------------------------------------------------|---------------------------------------------------------------------------------------------------------------------------------------------------------|
|                           | human oral mucosa keratinocytes (NHOK) and normal human oral mucosa fibroblasts (NHOF) |                                                                                                                   |                                                                                                                                 |                              |                                                                                                                                                                                                                                                          |                                                                                                                                                         |
| Yoshida et al., 2014 [23] | Sa3 cells (gingival cells)                                                             | Incubated at different concentration of 5-FU and TJ84 (Daiokanzoto) 24 h                                          | No TJ84                                                                                                                         | Mitochondria-specific ROS    | TJ-84 reduced the chemotherapy-induced mitochondria-derived-O <sub>2</sub> , compared to the control cells $p < 0.01$ . Mitochondrial targeting makes F15/Jp4-039 an effective protector from radiation. F15/Jp4-039 can reduce radiotherapy-induced OM. |                                                                                                                                                         |
| Shinde et al., 2016 [24]  | TC-1 epithelial cell from Fancd2+/, Fancd2+/- and Fancd2-/- mice                       | 1 hour treatment of 10 $\mu$ M JP4-039 before irradiation, or immediate addition of JP4-039 was after irradiation | Without JP4-039                                                                                                                 |                              | Intracellular ROS production was decreased with SM treatment and DPPH-scavenging activity was increased. $p < 0.001$ .                                                                                                                                   | SM treatment led to proliferation and protection from 5-FU-induced cytotoxicity.                                                                        |
| Kim et al., 2017 [25]     | Human pharyngeal cell (Detroit 562, ATCC CCL-138)                                      | Salvia miltiorrhiza Bunge (SM) on 5-fluorouracil (5-FU)-treated human pharyngeal cells.                           | No SM                                                                                                                           | ROS production (ROS assay)   |                                                                                                                                                                                                                                                          |                                                                                                                                                         |
| Park et al., 2018 [26]    | Human pharyngeal cell line Detroit 562 (ATCC CCL-138)                                  | OCE treatment                                                                                                     | Treated with each concentration of OCE (1, 5, 10, 50, or 100 $\mu$ g/mL) or with each concentration of OCE plus 10 $\mu$ M 5-FU | Intracellular ROS production | OCE decreases intracellular ROS production in human pharyngeal cell line $p < 0.01$ .                                                                                                                                                                    | Through MTT assay, DPPH radical scavenging activity, and ROS production, increased cell viability was observed due to high antioxidant activity of OCE. |

## In Vivo Studies

**Supplementary Table S2. Summary of *in vivo* study design and results of various chemical compounds as interventions.**

| AUTHOR, YEAR                         | POPULATION                                   | INTERVENTION                                                                                                             | COMPARATOR                                                                                                                                     | OUTCOME                                                                                                                                                                          | EFFECT OBSERVED                                                                                                                                                                                                                                                                                                                                            | MECHANISM OF ACTION                                                                                                                    |
|--------------------------------------|----------------------------------------------|--------------------------------------------------------------------------------------------------------------------------|------------------------------------------------------------------------------------------------------------------------------------------------|----------------------------------------------------------------------------------------------------------------------------------------------------------------------------------|------------------------------------------------------------------------------------------------------------------------------------------------------------------------------------------------------------------------------------------------------------------------------------------------------------------------------------------------------------|----------------------------------------------------------------------------------------------------------------------------------------|
| Iglesias-Bartolome et al., 2012 [10] | Rat model of radiotherapy-induced OM         | Rapamycin<br><i>N</i> = Unspecified, at least 6                                                                          | Untreated<br><i>N</i> = Unspecified, at least 6                                                                                                | Relative ulceration evaluation<br><br>Histological analysis of tongue<br><br>$\gamma$ H2AX and mitochondrial SOD assay                                                           | Rapamycin treated rats were completely protected (no <i>p</i> -value provided).<br><br>Histology of rat tongue after rapamycin showed preservation of epithelial layer after radiation.<br><br>p53, $\gamma$ H2AX expression was reduced and mitochondrial SOD level increased in rapamycin treatment compared to untreated (no <i>p</i> -value provided). | Increased mitochondrial SOD expression suggestive of promoting antioxidant effect and protection from radiation-induced OM and ulcers. |
| Shin et al., 2013 [15]               | Female Sprague-Dawley rats of six weeks old. | Administration of various concentrations of Epicatechin (up to 200 mM) after the radiation therapy.<br><i>N</i> = 8 each | Control group did not receive any radiation or Epicatechin, and the radiation-only group received radiation therapy only.<br><i>N</i> = 8 each | Intracellular ROS production and cell viability were measured to see the protective effects of Epicatechin on the radiation-induced oral mucositis.<br><br>Histological analysis | Epicatechin administration led to significant reduction in intracellular ROS generation ( <i>p</i> < 0.01) and prevented cell apoptosis induced by radiation therapy ( <i>p</i> < 0.01).<br><br>Epicatechin administration also saw reduction in oral mucosa ulceration and necrosis.                                                                      | Reduced intracellular ROS associated with reduced cell apoptosis and OM severity following radiation therapy                           |
| Kim et al., 2020 [17]                | Six-week-old female Sprague-Dawley rats      | N-acetylcysteine (NAC) treatment (airflow of 10.01L/min for 5 minutes) after radiotherapy<br><i>N</i> = 10               | Saline treatment after radiotherapy<br><i>N</i> = 10                                                                                           | ROS generation and protein-related DNA damage measured to evaluate protective effect of NAC against                                                                              | NAC led to significant reduction in the ROS production and showed preventive effect against radiation-induced oral mucositis ( <i>p</i> < 0.001).                                                                                                                                                                                                          | Suggestive that NAC inhibits ROS production mechanism for OM prevention                                                                |

|                                    |                                                        |                                                                                                                |                                                                          | radiotherapy-induced oral<br>mucositis.                                                                                                                                                                                           |                                                                                                                                                                                                                                                                                                                                                     |                                                                                                                                                                                                                                                   |
|------------------------------------|--------------------------------------------------------|----------------------------------------------------------------------------------------------------------------|--------------------------------------------------------------------------|-----------------------------------------------------------------------------------------------------------------------------------------------------------------------------------------------------------------------------------|-----------------------------------------------------------------------------------------------------------------------------------------------------------------------------------------------------------------------------------------------------------------------------------------------------------------------------------------------------|---------------------------------------------------------------------------------------------------------------------------------------------------------------------------------------------------------------------------------------------------|
| Ara et al.,<br>2008 [27]           | Five – six-week-<br>old male golden<br>Syrian hamsters | Intraperitoneal injection<br>of velafermin (4mg/kg)<br>diluted into vehicle (7%<br>Aminosyn).<br><i>N</i> = 10 | Administration of<br>the vehicle only<br>(7% Aminosyn).<br><i>N</i> = 10 | Visual examination of oral<br>mucositis<br><br>Inflammatory cytokines<br>(IL-6), and NF-E2-related<br>factor-2 were measured to<br>see the protective effects of<br>velafermin against<br>radiotherapy-induced oral<br>mucositis. | Administration of velafermin led<br>to significant reduction of the<br>degree of oral mucositis compared<br>to the control group ( $p < 0.001$ ).<br><br>Velafermin treatment led to<br>significant reduction in IL-6 level<br>and led to significant increase in<br>the NF-E2-related factor-2<br>(increased protection from ROS) ( $p < 0.001$ ). | IL-6 pro-<br>inflammatory<br>cytokine and NF-<br>E2-related factor-2,<br>involved in DNA<br>repair, increased<br>and was associated<br>with improvement<br>in OM condition.<br>However, no<br>oxidative stress<br>mechanism<br>directly evaluated |
| Clemenso<br>n et al.,<br>2019 [28] | Female C57BL/6<br>mice.                                | Slow tail vein injection of<br>CPh-1014 (free radical<br>scavenger).<br><i>N</i> = 6                           | No injection of<br>CPh-1014 (free<br>radical scavenger).<br><i>N</i> = 6 | DNA damage was<br>evaluated, by assessment<br>of $\gamma$ H2AX foci formation,<br>to see the protected effect<br>of CPh-1014 against<br>radiation-induced oral<br>mucositis.                                                      | CPh-1014 injection was able to<br>reduce the radiation-induced DNA<br>damage in oral mucosa and<br>reduced the severity of oral<br>mucositis ( $p < 0.05$ ).                                                                                                                                                                                        | Reduced genetic<br>damage but no<br>reported<br>antioxidant<br>mechanism<br>reported                                                                                                                                                              |
| Nakajima<br>et al., 2015<br>[29]   | Mouse model of<br>radiotherapy-<br>induced OM          | 30 or 300mg/kg<br>edaravone<br><i>N</i> = 20 each                                                              | Control, intact<br><i>N</i> = 20 each                                    | Survival rate<br><br>Mean and total OM score<br><br>Histopathological analysis<br><br>TUNEL assay<br><br>Lipid peroxidation by TBARS<br>assay<br><br>MPO activity                                                                 | Survival rate decreased after 12<br>days of initial treatment in both<br>edaravone groups.<br><br>Edaravone groups had reduced<br>mean OM score 10 and 12 days<br>after initial treatment ( $p < 0.05$ ).<br><br>Edaravone groups had lower total<br>OM score compared to control ( $p < 0.05$ ).                                                   | Reduction of lipid<br>peroxidation and<br>MPO associated<br>with reduced OM<br>severity                                                                                                                                                           |

|                         |                                          |                                                 |                                                                                                                  |                                                                                                                                                     |                                                                                                                                                                                                                                                                                                                                                                                                                                                           |                                                                                                                     |
|-------------------------|------------------------------------------|-------------------------------------------------|------------------------------------------------------------------------------------------------------------------|-----------------------------------------------------------------------------------------------------------------------------------------------------|-----------------------------------------------------------------------------------------------------------------------------------------------------------------------------------------------------------------------------------------------------------------------------------------------------------------------------------------------------------------------------------------------------------------------------------------------------------|---------------------------------------------------------------------------------------------------------------------|
|                         |                                          |                                                 |                                                                                                                  |                                                                                                                                                     | <p>Histopathologically, edaravone groups had limited epidermolysis and inflammatory cell infiltration.</p> <p>TUNEL positive cells were lower in both edaravone groups (<math>p &lt; 0.05</math>).</p> <p>Both edaravone groups had reduced TBARS levels, but only 300mg/kg edaravone was statistically significant (<math>p &lt; 0.05</math>).</p> <p>MPO activity was reduced in both edaravone groups (<math>p &lt; 0.05</math>).</p>                  |                                                                                                                     |
| Mafra et al., 2019 [30] | Hamster model of chemotherapy-induced OM | 1, 5 or 10mg/kg Gliclazide<br>$N = 5$ per group | Saline<br>$N = 5$                                                                                                | <p>OM evaluation</p> <p>Histopathological analysis and scoring</p> <p>Oxidative stress by MDA and MPO assays</p> <p>Inflammation by ELISA assay</p> | <p>Reduced OM score at 1, 5 and 10mg/kg gliclazide (<math>p &lt; 0.05</math>; <math>p &lt; 0.05</math>; <math>p &lt; 0.01</math>, respectively).</p> <p>10mg/kg gliclazide had a lower histopathological score compared to saline treated mice (<math>p &lt; 0.01</math>).</p> <p>10mg/kg gliclazide reduced MDA and MPO levels (<math>p &lt; 0.05</math>); and TNF-<math>\alpha</math> and IL-1<math>\beta</math> levels (<math>p &lt; 0.05</math>).</p> | MDA and MPO reduction suggestive of limiting OM severity via oxidative stress mechanism.                            |
| Yang et al., 2018 [31]  | Mouse model of radiotherapy-induced OM   | 4 or 6g/kg DMSO by i.p<br>$N = 7$               | <p>Saline<br/><math>N = 7</math></p> <p>Untreated<br/><math>N = 7</math></p> <p>rhKGF<br/><math>N = 7</math></p> | <p>Histological evaluation</p> <p>Thickness of tongue mucosa</p> <p>P63+ cell density</p> <p>Ki-67+ cell density</p>                                | <p>DMSO completely resolved inflammation induced by radiation</p> <p>Tongue mucosa thickness increased compared to saline groups 7 (<math>p &lt; 0.01</math>) and 9 (<math>p &lt; 0.001</math>) days after irradiation. Mucosal thickness by DMSO was equivalent to amifostine and rhKGF</p>                                                                                                                                                              | $\gamma$ -H2AX has initial cytoprotective effect via DNA repair. However, oxidative stress mechanism not evaluated. |

|                             |                                        |                                                                                                                         |                                                                                                                                |                                                                                                             |                                                                                                                                                                                                                                                                                                                                                                                                                                                                                                                                                                                |                                                                                          |
|-----------------------------|----------------------------------------|-------------------------------------------------------------------------------------------------------------------------|--------------------------------------------------------------------------------------------------------------------------------|-------------------------------------------------------------------------------------------------------------|--------------------------------------------------------------------------------------------------------------------------------------------------------------------------------------------------------------------------------------------------------------------------------------------------------------------------------------------------------------------------------------------------------------------------------------------------------------------------------------------------------------------------------------------------------------------------------|------------------------------------------------------------------------------------------|
|                             |                                        |                                                                                                                         | Amifostine<br><i>N</i> = 7                                                                                                     | Immunofluorescence<br>analysis                                                                              | <p>Ulcer size reduced when DMSO was injected 1 hour (<math>p &lt; 0.001</math>), 3 hours (<math>p &lt; 0.01</math>) and 6 hours (<math>p &lt; 0.05</math>) prior to irradiation, when compared to saline. DMSO was more effective than amifostine or rhKGF in reducing ulcer size</p> <p>DMSO treatment maintained proliferative potential of epithelial cells compared to vehicle controls, by p63+ and Ki-67+ quantification (<math>p &lt; 0.05</math>)</p> <p>After 6 hours of irradiation, DMSO reduced the proportion of cells positive for <math>\gamma</math>-H2AX.</p> |                                                                                          |
| Ortiz et al., 2015 [32]     | Male Wistar rats                       | Radiation therapy and application of gel with 3% melatonin or intraperitoneal injection of melatonin.<br><i>N</i> = 4-6 | Radiation therapy and administration of either gel with no melatonin or intraperitoneal injection of saline.<br><i>N</i> = 4-6 | <p>LPO, GPx, GRd, and GSH/GSSG assayed by western blot</p> <p>Histopathological analysis of oral tissue</p> | <p>GPx increased; GSSG/GSH, LPO and GRd decreased in melatonin treated groups (<math>p &lt; 0.05</math>)</p> <p>Melatonin administration reduced oral mucositis ulcer size (<math>p &lt; 0.001</math>).</p>                                                                                                                                                                                                                                                                                                                                                                    | Reduced GSSG/GSH ratio, LPO and GRd associated with improved oral mucositis presentation |
| Shimamura et al., 2019 [33] | Mouse model of chemotherapy-induced OM | 0.015 or 0.03 $\mu$ M GGsTop<br><i>N</i> =5 each                                                                        | <p>Saline<br/><i>N</i> = 5</p> <p>Untreated<br/><i>N</i> = 5</p>                                                               | <p>Ulcer area</p> <p>Treatment period</p> <p>Histological analysis of oral mucosa</p>                       | <p>0.03<math>\mu</math>M GGsTop reduced ulcer area at day 5 and after (<math>p &lt; 0.05</math>).</p> <p>Mean treatment period for 0.03<math>\mu</math>M GGsTop, until resolution of OM, was significantly lower at 16 days compared to untreated group at 18 days (<math>p &lt; 0.05</math>).</p>                                                                                                                                                                                                                                                                             | GGsTop selectively inhibits GGT to promote glutathione.                                  |

|                           |                                           |                                                                                                                                   |                                                                                            |                                                                                                                                                                                |                                                                                                                                                                                                                                                                                                                                                                                                                                                                              |                                                                                                     |
|---------------------------|-------------------------------------------|-----------------------------------------------------------------------------------------------------------------------------------|--------------------------------------------------------------------------------------------|--------------------------------------------------------------------------------------------------------------------------------------------------------------------------------|------------------------------------------------------------------------------------------------------------------------------------------------------------------------------------------------------------------------------------------------------------------------------------------------------------------------------------------------------------------------------------------------------------------------------------------------------------------------------|-----------------------------------------------------------------------------------------------------|
| Im et al., 2019 [34]      | Five – eight-week-old female C57BL/6 mice | Administration of various NecroX-7 dosage (0.3, 3 or 30 mg/kg) before 5-FU treatment. <i>N</i> = 8 each                           | Administration of saline solution before 5-FU treatment. <i>N</i> = 8                      | ROS and $\gamma$ H2AX quantified as main oxidative stress biomarkers, Mitochondrial structure and HMGB1 translocation were examined                                            | Histologically, there was early oral mucosal healing in mice treated with 0.03 $\mu$ M GGsTop compared to untreated. Furthermore, collagen production was promoted in 0.03 $\mu$ M GGsTop group<br>In the experimental groups, NecroX-7 administration led to reduced oxidative stress, dysfunction of mitochondria, and apoptosis in 5FU-induced oral mucositis. Levels of ROS and $\gamma$ H2AX have been reduced by NecroX-7 ( <i>p</i> < 0.001).                         | Reduced ROS and $\gamma$ H2AX, implicated in chemotherapy-induced OM, and mitochondrial dysfunction |
| Ala et al., 2020 [35]     | Thirty-three Wistar rats.                 | Daily dose administration of sumatriptan intraperitoneally for four consecutive days along with radiotherapy. <i>N</i> = 3-6 each | Daily saline administration intraperitoneally along with radiotherapy. <i>N</i> = 3-6 each | Malondialdehyde (MDA) and inflammatory cytokine (TNF- $\alpha$ ) levels were measured to see the protective effect of sumatriptan against radiotherapy-induced oral mucositis. | Sumatriptan treated rats had well maintained oral epithelial thickness and reduced mucosal damage than untreated ( <i>p</i> < 0.05).<br><br>There was a significant increase in the MDA level (marker of lipid peroxidation) and TNF- $\alpha$ in control group, compared to the healthy rats ( <i>p</i> < 0.0001). There was a significant decrease in the MDA level and TNF-a in the experiment group with sumatriptan, compared to the control groups ( <i>p</i> < 0.01). | Reduction in MDA was associated with the reduction in OM severity.                                  |
| Yoshino et al., 2014 [36] | Hamster model of chemotherapy-induced OM  | 60mg/kg 5-FU + 10% acetic acid <i>N</i> = 8-11                                                                                    | Saline <i>N</i> = 8-11<br><br>10% acetic acid <i>N</i> = 8-11                              | Area of OM<br><br>MDA concentration                                                                                                                                            | Mice treated with 5-FU alone was not enough to induce OM. Acetic acid, or with the addition of 5-FU, produces OM.                                                                                                                                                                                                                                                                                                                                                            | MDA contribute to oxidative stress, and higher carbamoyl-proxyl has been reported to be associated  |

|                               |                                                                |                                                                                                                                                                                                                                          |                                                                                                          |                                                                                                                        |                                                                                                                                                                                    |                                                                                                      |
|-------------------------------|----------------------------------------------------------------|------------------------------------------------------------------------------------------------------------------------------------------------------------------------------------------------------------------------------------------|----------------------------------------------------------------------------------------------------------|------------------------------------------------------------------------------------------------------------------------|------------------------------------------------------------------------------------------------------------------------------------------------------------------------------------|------------------------------------------------------------------------------------------------------|
|                               |                                                                |                                                                                                                                                                                                                                          | 60mg/kg 5-FU<br>N = 8-11                                                                                 | Decay rate constant by<br>probing for carbamoyl-<br>proxyl                                                             | Acetic acid alone or with 5-FU had<br>increased MDA concentration<br>compared to saline and 5-FU<br>controls ( $p < 0.05$ ).                                                       | with increased<br>oxidative stress.                                                                  |
|                               |                                                                |                                                                                                                                                                                                                                          |                                                                                                          |                                                                                                                        | Decay of ROS was lower in 5-FU<br>and acetic treatments, but higher in<br>the acetic acid control group ( $p < 0.05$ ).                                                            |                                                                                                      |
| Vilar et al.,<br>2020 [37]    | Male golden<br>Syrian hamsters.                                | Oral mucositis induced<br>by 5-FU, and<br>administration of gold<br>nanoparticles (AuNP)<br>with<br>polyvinylpyrrolidone<br>(PVP)<br>N = 5                                                                                               | Oral mucositis<br>induced by 5-FU<br>and administration<br>of PVP<br>N = 5                               | IL-1 $\beta$ and GSH level<br>quantified by ELISA assay<br><br>Histological analysis of<br>oral tissues                | AuNP treatment has reduced IL-1 $\beta$<br>and increased GSH level ( $p < 0.0001$ ) and reduced oral mucositis<br>symptoms following 5-FU pre-<br>treatment ( $p < 0.001$ )        | Increased GSH<br>and reduced IL-1 $\beta$<br>associated with<br>reduction of OM<br>presentation      |
| Gümüs et<br>al., 2020<br>[38] | Twenty-one –<br>thirty-day old<br>female Wistar<br>albino rats | Triamcinolone acetoneide<br>(TA) topical application<br>(1.1% mg/gr) with 5-FU<br>therapy (60mg/kg)<br>intraperitonially OR<br>chlorhexidine (CHX) oral<br>rinse application (0.2<br>w/v) with 5-FU therapy<br>(60mg/kg).<br>N = 10 each | Placebo group<br>with NaCl oral<br>rinse, Control<br>group with 5-FU<br>therapy (60mg/kg).<br>N = 8 each | GSH and LPO level<br>measured to evaluate the<br>preventive effect of TA and<br>CHX on 5-FU induced oral<br>mucositis. | GSH level was significantly higher<br>in TA and CHX treatment groups<br>compared to the control ( $p < 0.001$ ).<br><br>LPO was reduced in both<br>treatment groups ( $p < 0.05$ ) | Greater GSH<br>associated with<br>reduced oral<br>mucositis severity.<br>Reverse is true for<br>LPO. |

**Supplementary Table S3. Summary of *in vivo* study design and results of rebamipide as an intervention.**

| AUTHOR,<br>YEAR                  | POPULATION                         | INTERVENTION                                                    | COMPARATOR               | OUTCOME                                    | EFFECT OBSERVED                                                                                                                     | MECHANISM OF<br>ACTION               |
|----------------------------------|------------------------------------|-----------------------------------------------------------------|--------------------------|--------------------------------------------|-------------------------------------------------------------------------------------------------------------------------------------|--------------------------------------|
| Takeuchi et<br>al., 2018<br>[39] | Ten-week-old ICR<br>mouse model of | Rebamipide-loaded<br>PLGA nanoparticles<br>coated with chitosan | Untreated,<br>rebamipide | Ulceration area and<br>duration of therapy | Reduction in ulcer area at days 9 ( $p < 0.01$ ), 11 ( $p < 0.01$ ) and 13 ( $p < 0.01$ ) of<br>rebamipide-loaded PLGA nanoparticle | No antioxidant<br>mechanism assessed |

|                             |                                                                         |                                                                                         |                                                     |                                                                                                             |                                                                                                                                                                                                                                                                                                                                                                                                                                                                       |                                   |
|-----------------------------|-------------------------------------------------------------------------|-----------------------------------------------------------------------------------------|-----------------------------------------------------|-------------------------------------------------------------------------------------------------------------|-----------------------------------------------------------------------------------------------------------------------------------------------------------------------------------------------------------------------------------------------------------------------------------------------------------------------------------------------------------------------------------------------------------------------------------------------------------------------|-----------------------------------|
|                             | chemotherapy-induced OM                                                 | N = 5                                                                                   | suspension only or nanoparticles only<br>N = 5 each |                                                                                                             | treatment compared to non-treated group.                                                                                                                                                                                                                                                                                                                                                                                                                              |                                   |
| Nakashima et al., 2014 [40] | Rat model of radiotherapy-induced OM                                    | 2% rebamipide liquid with micro-crystals or submicronized crystals<br>N = 3-8 per group | Purified water<br>N = 3-8                           | Reduction ratio of rat oral ulcer<br><br>Ulcer-like percentage area of tongue                               | 2% rebamipide liquid with submicronized crystals were more potent than micro-crystals in reducing radiation-induced oral ulcers and was dosage-dependent ( $p < 0.01$ ).<br><br>Ulcer-like percentage area was lower in mice treated with rebamipide ( $p < 0.05$ ). Rebamipide had pre-treatment period-dependent ( $p < 0.05$ ), dosing frequency-dependent ( $p < 0.05$ ) and dose-dependent effect ( $p < 0.01$ ) on reduction of tongue damaged area percentage. | No antioxidant mechanism assessed |
| Nakashima et al., 2017 [41] | Six-week-old Crl:CD Sprague-Dawley rat model of radiotherapy-induced OM | 1, 2 or 4% rebamipide liquid<br>N = 10-12 per group                                     | Vehicle control<br>N = 11                           | OM evaluation as damaged oral mucosa relative to area of tongue<br><br>Inflammatory gene and protein levels | Rebamipide had dose-dependent effect on reduction of inflammatory protein level and gene expression ( $p < 0.01$ ).                                                                                                                                                                                                                                                                                                                                                   | No antioxidant mechanism assessed |

**Supplementary Table S4. Summary of *in vivo* study design and results of botanical extracts and natural compounds as interventions.**

| AUTHOR, YEAR          | POPULATION                                                     | INTERVENTION                                        | COMPARATOR                                                               | OUTCOME                                                                                                      | EFFECT OBSERVED                                                                                                                                                                                                                                                                                                                                | MECHANISM OF ACTION                                                                 |
|-----------------------|----------------------------------------------------------------|-----------------------------------------------------|--------------------------------------------------------------------------|--------------------------------------------------------------------------------------------------------------|------------------------------------------------------------------------------------------------------------------------------------------------------------------------------------------------------------------------------------------------------------------------------------------------------------------------------------------------|-------------------------------------------------------------------------------------|
| Kim et al., 2017 [25] | Seven-week-old golden hamster model of chemotherapy-induced OM | 100, 500 or 1000µg/mL S. miltiorrhiza<br>N = 6 each | Untreated<br>N = 6<br><br>Naïve<br>N = 6<br><br>Benzydimine HCl<br>N = 6 | Histological assessment of buccal mucosa<br><br>IL-1β, TNF-α, NF-κB and caspase-3 expression by western blot | S. miltiorrhiza treatment showed healed ulcerated oral mucosa.<br><br>Active caspase-3 expression was reduced in 500 and 1000µg/mL S. miltiorrhiza treated groups compared to control ( $p < 0.05$ and $< 0.01$ , respectively).<br><br>1000µg/mL S. miltiorrhiza also saw reduced TNF-α and IL-1β compared to the control (both $p < 0.05$ ). | Antioxidant or oxidative stress not assessed <i>in vivo</i> , but <i>in vitro</i> . |

|                                      |                                                                            |                                                                                                                  |                                                       |                                                                                                                                                                               |                                                                                                                                                                                                                                                                                                                        |                                                                                             |
|--------------------------------------|----------------------------------------------------------------------------|------------------------------------------------------------------------------------------------------------------|-------------------------------------------------------|-------------------------------------------------------------------------------------------------------------------------------------------------------------------------------|------------------------------------------------------------------------------------------------------------------------------------------------------------------------------------------------------------------------------------------------------------------------------------------------------------------------|---------------------------------------------------------------------------------------------|
|                                      |                                                                            |                                                                                                                  |                                                       |                                                                                                                                                                               | Both 500 and 1000µg/mL <i>S. miltiorrhiza</i> saw increased cytoplasm NF-κB expression (both $p < 0.05$ ), but only 1000µg/mL treatment group saw lower nuclear NF-κB expression compared to the control ( $p < 0.05$ ).                                                                                               |                                                                                             |
| Park et al., 2018 [26]               | Seven-week-old male golden Syrian hamsters                                 | Administration with onchung-eum (100, 500, or 1000 mg /kg) with the 5-FU treatment.<br>$N = 6$ each              | Only 5-FU treatment.<br>$N = 6$ each                  | Cell viability<br><br>ROS production                                                                                                                                          | Onchung-eum treatment led to significant recovery of the epithelial layers of oral mucosa after induction of chemotherapy-induced oral mucositis. Moreover, ROS production was significantly decreased in the treatment groups with onchung-eum compared to the control group with just 5-FU treatment ( $p < 0.01$ ). | Reduction of ROS production contributed to improvement of OM presentation                   |
| Koohi-Hosseinabadi et al., 2015 [42] | Six – eight-week-old male golden hamsters model of chemotherapy-induced OM | <i>Z. jujuba</i> hydroalcoholic extract in topical gel (20%) or dietary form (300 mg/kg).<br>$N = 14$ each       | No treatment following 5-FU chemotherapy.<br>$N = 14$ | OM intensity associated with antioxidative stress protection as evaluated by SOD and MDA level                                                                                | Both the topical and dietary application of <i>Z. jujuba</i> hydroalcoholic extract could reduce the intensity of chemotherapy-induced oral mucositis ( $p < 0.05$ ), and the concentration of MDA, while increasing the activity of SOD ( $p < 0.001$ ).                                                              | Not reported                                                                                |
| Koohi-Hosseinabadi et al., 2017 [43] | Adult male golden hamster model of chemotherapy-induced OM                 | <i>E. angustifolia</i> hydroalcoholic extract in topical gel (10%) or dietary form (300 mg/kg).<br>$N = 14$ each | No treatment following 5-FU chemotherapy.<br>$N = 14$ | The SOD level, MDA and MPO levels were measured to investigate the protective effect of <i>E. angustifolia</i> hydroalcoholic extract on chemotherapy-induced oral mucositis. | Both forms of <i>E. angustifolia</i> hydroalcoholic extract reduced MDA and MPO levels, while significantly increasing the SOD activity ( $p < 0.05$ ).                                                                                                                                                                | SOD, MDA and MPO implicated in antioxidative stress protection in chemotherapy-model of OM. |

|                            |                                                                   |                                                                                   |                       |                                                                     |                                                                                                                                                                                                                                                                                                                                                                                            |                                                                                                                          |
|----------------------------|-------------------------------------------------------------------|-----------------------------------------------------------------------------------|-----------------------|---------------------------------------------------------------------|--------------------------------------------------------------------------------------------------------------------------------------------------------------------------------------------------------------------------------------------------------------------------------------------------------------------------------------------------------------------------------------------|--------------------------------------------------------------------------------------------------------------------------|
| Tanideh et al., 2019 [44]  | Six-week-old golden male hamster model of radiotherapy-induced OM | 1% T. ammi extract gel<br>N = 18                                                  | Untreated<br>N = 18   | Volume density of epithelium by stereology assessment               | P. atlantica and T. ammi either alone or together, after 13 days of treatment, had increased oral epithelium density ( $p < 0.01$ , each).                                                                                                                                                                                                                                                 | Higher MDA and MPO are associated with greater oxidative stress.<br><br>SOD negatively associated with oxidative stress. |
|                            |                                                                   | 3% P. atlantica extract gel<br>N = 18                                             |                       | Tissue MDA level, MPO and SOD activity                              | Tissue MDA, MPO and IL-1 $\beta$ levels were reduced in P. atlantica, T. ammi and as a mixed gel at days 13 ( $p < 0.001$ for P. atlantica; $p < 0.01$ for T. ammi), 15 (both $p < 0.001$ ) and 17 (both $p < 0.001$ ). Mixed treatment was reduced for days 13, 15 and 17 (all $p < 0.001$ ). Furthermore, mixed treatment was more effective than either treatment alone ( $p < 0.01$ ). |                                                                                                                          |
|                            |                                                                   | 1% T. ammi extract + 3% P. atlantica extract gel<br>N = 18                        |                       | Tissue IL-1 $\beta$ level                                           | SOD activity was higher in the three treatment types compared to untreated ( $p < 0.05$ ). P. atlantica was more effective than T. ammi for SOD activity on days 15 ( $p < 0.001$ ) and 17 ( $p = 0.004$ ).                                                                                                                                                                                |                                                                                                                          |
| Watanabe et al., 2013 [45] | Seven-week-old golden hamster model of chemotherapy-induced OM    | 10 or 30% royal jelly contained in chitosan-sodium alginate film<br>N = 6-12 each | Naïve<br>N = 6        | Ulcer area                                                          | 10 and 30% royal jelly film, compared to film and untreated groups, reduced the area of OM ( $p < 0.05$ ).                                                                                                                                                                                                                                                                                 | MPO associated with greater oxidative stress.                                                                            |
|                            |                                                                   |                                                                                   | Film<br>N = 12        | MPO activity expressed as unit/g cheek pouch                        | MPO activity that had increased in the control group, following chemical insult, was reduced in the royal jelly groups ( $p < 0.05$ ).                                                                                                                                                                                                                                                     |                                                                                                                          |
|                            |                                                                   |                                                                                   | Untreated<br>N = 6-12 | IL-1 $\beta$ and TNF- $\alpha$ expression via western blot analysis | IL-1 $\beta$ and TNF- $\alpha$ expressions were also increased in the untreated group but reduced in the royal jelly groups ( $p < 0.01$ ; 30% RJ v control for TNF- $\alpha$ $p < 0.05$ ).                                                                                                                                                                                                |                                                                                                                          |
|                            |                                                                   |                                                                                   |                       | Histopathological evaluation                                        |                                                                                                                                                                                                                                                                                                                                                                                            |                                                                                                                          |

|                           |                                                                     |                                                                                                                                    |                                                                                                                                                        |                                                                                                                          |                                                                                                                                                                                                                                             |                                                                                                                |
|---------------------------|---------------------------------------------------------------------|------------------------------------------------------------------------------------------------------------------------------------|--------------------------------------------------------------------------------------------------------------------------------------------------------|--------------------------------------------------------------------------------------------------------------------------|---------------------------------------------------------------------------------------------------------------------------------------------------------------------------------------------------------------------------------------------|----------------------------------------------------------------------------------------------------------------|
|                           |                                                                     |                                                                                                                                    |                                                                                                                                                        |                                                                                                                          | There was fewer infiltration of inflammatory cells, reduced ulceration and abscesses in the royal jelly treated groups. Epithelial healing was observed in this group.                                                                      |                                                                                                                |
| Takuma et al., 2008 [46]  | Male Syrian golden hamsters of six weeks old.                       | Administration of <i>E. japonica</i> seed extract (10ml/day) after oral mucositis was induced by 5-FU treatment. <i>N</i> = 6 each | Control group had Administration of water instead of <i>E. japonica</i> seed extract after 5-FU treatment. Normal group had no treatment. <i>N</i> = 6 | OM features evaluated graded<br><br>Plasma lipid peroxide level quantified                                               | Reduced mucositis score in treated group compared to negative controls ( $p < 0.05$ ).<br><br>Lipid peroxide level comparable to naïve group but reduced compared to negative controls ( $p < 0.05$ ).                                      | Reduction in lipid peroxide associated with lower mucositis score                                              |
| Rezvani & Ross, 2004 [47] | Twelve-week-old Sprague-Dawley rat model of radiotherapy-induced OM | 0.5mL compound A<br><i>N</i> = 8                                                                                                   | Untreated<br><i>N</i> = 8<br><br>Sunflower oil<br><i>N</i> = 8<br><br>$\alpha$ -tocopherol<br><i>N</i> = 8                                             | Oral mucositis incidence in irradiated rats                                                                              | Sunflower oil and $\alpha$ -tocopherol required more radiation to induce OM in rats; each require 1.05 and 1.09 times more than untreated mice, respectively. Compound A required 1.2 times more radiation for onset of OM ( $p < 0.001$ ). | No assessment of antioxidation. Sunflower oil and $\alpha$ -tocopherol have reported for antioxidative effect. |
| Gupta et al., 2020 [48]   | Ten-week-old female C3H mice                                        | Intraperitoneal injection of either PBS or 5-FU with <i>L. reuteri</i> containing water<br><i>N</i> = 12 each                      | Intraperitoneal injection of either PBS or 5-FU with water<br><i>N</i> = 12 each                                                                       | Expression of oxidative stress markers and antioxidant genes<br><br>Histological alterations of the oral mucosal tissues | In the experiment groups, epithelial damage was significantly lower compared to control groups ( $p < 0.001$ )<br>Moreover, oxidative stress was reduced in the oral mucosal tissues ( $p < 0.001$ ).                                       | Not reported                                                                                                   |
| Cuba et al., 2020 [49]    | Ten-week-old male CF-1 mouse model of                               | 3, 10 or 30mg/kg cannabidiol<br><i>N</i> = 5-9 each                                                                                | Placebo<br><i>N</i> = 9 each                                                                                                                           | OM evaluation<br><br>Histological analysis of inflammatory response                                                      | Reduced OM grade with 7 days of 30mg/kg cannabidiol ( $p < 0.01$ ), but reduced inflammation only for 3 and 10mg/kg cannabidiol.                                                                                                            | Catalase and glutathione associated with reduced OM grade.                                                     |

|                                 |                                                                          |                                        |                                                                                                                  |                                                                                                                      |                                                                                                                                                                                                                                                                                                                                                                                                                                                                                                                                                                                                                                                               |                                                                                                                                                               |
|---------------------------------|--------------------------------------------------------------------------|----------------------------------------|------------------------------------------------------------------------------------------------------------------|----------------------------------------------------------------------------------------------------------------------|---------------------------------------------------------------------------------------------------------------------------------------------------------------------------------------------------------------------------------------------------------------------------------------------------------------------------------------------------------------------------------------------------------------------------------------------------------------------------------------------------------------------------------------------------------------------------------------------------------------------------------------------------------------|---------------------------------------------------------------------------------------------------------------------------------------------------------------|
|                                 | chemotherapy-induced OM                                                  |                                        |                                                                                                                  | Glutathione levels and catalase activity by biochemical analysis                                                     | Glutathione levels were reduced in mice treated with cannabidiol for 7 days compared to 4 days ( $p < 0.01$ ).                                                                                                                                                                                                                                                                                                                                                                                                                                                                                                                                                |                                                                                                                                                               |
|                                 |                                                                          |                                        |                                                                                                                  |                                                                                                                      | Catalase activity reduced in 7-day treatment compared to 4-day treatment ( $p < 0.01$ ).                                                                                                                                                                                                                                                                                                                                                                                                                                                                                                                                                                      |                                                                                                                                                               |
| Aghel et al., 2014 [50]         | Seven – eleven-week-old Wistar rat model of radiotherapy-induced OM      | 400mg/kg propolis<br>$N = 7$           | Saline<br>$N = 7$                                                                                                | OM score<br><br>Antioxidant evaluation                                                                               | Mucositis severity was higher in saline group than propolis treated group ( $p = 0.025$ ).<br><br>Salivary antioxidants higher in propolis treated group at day 0, and lowered after 10 days of daily propolis treatment ( $p = 0.041$ )                                                                                                                                                                                                                                                                                                                                                                                                                      | Greater, but statistically insignificant different, salivary antioxidants associated with less mucositis severity. However, no specific antioxidant mechanism |
| Motallebnejad et al., 2020 [51] | Ten – twelve-week-old Wistar albino rat model of radiotherapy-induced OM | 25 or 50mg/kg lycopene<br>$N = 7$ each | 50mg/kg lycopene without irradiation<br>$N = 7$<br><br>Vehicle control<br>$N = 7$<br><br>Time control<br>$N = 7$ | Mean weight<br><br>OM grade<br><br>Antioxidant activity by FRAP assay<br><br>Lipid peroxidation level by TBARS assay | Mean weight not affected by treatment type but reduced after 10 days for all groups ( $p < 0.001$ ).<br><br>Only 50mg/kg lycopene treatment after irradiation was able to prevent OM grade of more than 2. Both lycopene concentrations scored lower for OM grade on day 3 (25mg/kg: $p < 0.05$ ; 50mg/kg: $p < 0.001$ ) and on day 6 (25mg/kg: $p < 0.05$ ; 50mg/kg: $p < 0.001$ ) post-irradiation. On day 6, 50mg/kg lycopene reduced the OM grade further than 25mg/kg ( $p < 0.001$ ).<br><br>FRAP assay reading was higher for all tested concentrations of lycopene regardless of irradiation (50mg/kg without irradiation: $p < 0.001$ ; 25mg/kg: $p$ | Antioxidant activity was higher after 50mg/kg lycopene treatment. Lipid peroxidation was lowered in lycopene treatment to reduce oxidative stress.            |

< 0.05; 50mg/kg:  $p < 0.001$ ) and TBARS assay reading was elevated in the irradiated control ( $p < 0.001$ ), and irradiated lycopene groups (both  $p < 0.05$ ) at day 10. TBARS levels was reduced in 25 and 50mg/kg lycopene with irradiation ( $p < 0.05$  and  $p < 0.001$ , respectively).

**Supplementary Table S5. Summary of *in vivo* study design and results of MnBuOE as an intervention.**

| AUTHOR, YEAR               | POPULATION                               | INTERVENTION                                                                                                                     | COMPARATOR                                                     | OUTCOME                                                                                                                  | EFFECT OBSERVED                                                                                                                                                                                                                                                   | MECHANISM OF ACTION                                                  |
|----------------------------|------------------------------------------|----------------------------------------------------------------------------------------------------------------------------------|----------------------------------------------------------------|--------------------------------------------------------------------------------------------------------------------------|-------------------------------------------------------------------------------------------------------------------------------------------------------------------------------------------------------------------------------------------------------------------|----------------------------------------------------------------------|
| Birer et al., 2017 [52]    | Six – eight-week-old C56BL/6 female mice | Subcutaneous MnBuOE (a redox-active manganese-porphyrin dissolved in saline) injection, along with radiotherapy. $N = 8-13$ each | Saline administration along with radiotherapy. $N = 8-13$ each | GSH/GSSG ratio was measured to evaluate the protective effect of MnBuOE against the radiotherapy-induced oral mucositis. | In the control group, radiotherapy without any additional treatment led to decrease in GSH/GSSG ratio indicating increase in the oxidative stress. In the experimental group, addition of MnBuOE led to increase in GSH/GSSG ratio compared to the control group. | GSH/GSSG increase associated with radiotherapy-induced OM protection |
| Ashcraft et al., 2015 [53] | C57Bl/6 mice                             | Subcutaneous MnBuOE injection with irradiation targeted to salivary glands and oral cavity. $N = 3$ each                         | No irradiation. $N = 3$ each                                   | Protective effect of MnBuOE against radiotherapy-induced oral mucositis.                                                 | MnBuOE led to significant reduction in radiotherapy-induced oral mucositis ( $p = 0.009$ ). Overall, MnBuOE can widen the therapeutic margin of radiation dose, which gives more power to control tumours.                                                        | Not reported                                                         |

Supplementary Table S6. Summary of *in vivo* study design and results of photobiomodulation as an intervention.

| AUTHOR,<br>YEAR             | POPULATION                                  | INTERVENTION                                                                                                                                  | COMPARATO<br>R                                                                                                                                                                                                                                                                                                                                       | OUTCOME                                                                                                                                                               | EFFECT OBSERVED                                                                                                                                                                                                                                                                                                                                     | MECHANISM OF<br>ACTION                                                                                             |
|-----------------------------|---------------------------------------------|-----------------------------------------------------------------------------------------------------------------------------------------------|------------------------------------------------------------------------------------------------------------------------------------------------------------------------------------------------------------------------------------------------------------------------------------------------------------------------------------------------------|-----------------------------------------------------------------------------------------------------------------------------------------------------------------------|-----------------------------------------------------------------------------------------------------------------------------------------------------------------------------------------------------------------------------------------------------------------------------------------------------------------------------------------------------|--------------------------------------------------------------------------------------------------------------------|
| Cruz et al., 2015<br>[54]   | Female Syrian<br>golden<br>hamsters.        | Group<br>(aPDT)received<br>antimicrobial laser<br>and<br>photodynamnic<br>therapy (aPDT)<br>along with 5-FU<br>chemotherapy.<br><i>N</i> = 54 | Group (C) with<br>just vehicle of<br>chemotherapy,<br>Group (Ch)<br>received just 5-<br>FU<br>chemotherapy<br><i>N</i> = 36<br><br>Group (ChP)<br>received<br>methylene blue<br>(0.01%) along<br>with 5-FU<br><i>N</i> = 48<br><br>Group (ChL)<br>received<br>methylene blue<br>(0.01%), LDL<br>irradiation, and<br>5-FU treatment.<br><i>N</i> = 55 | SOD and<br>catalase<br>levels were<br>measured to<br>evaluate the<br>protective<br>effect of<br>aPDT against<br>the<br>chemotherap<br>y-induced<br>oral<br>mucositis. | The experimental group with aPDT treatment<br>led to most healing of OM (76%), and the<br>persistence of the oral mucositis was the lowest<br>for this group compared to control and any<br>other experimental groups ( <i>p</i> = 0.67172). SOD<br>was increased ( <i>p</i> < 0.05), and catalase ( <i>p</i> < 0.05)<br>decreased after seven days | Increased SOD and<br>reduced catalase were<br>associated with OM<br>healing                                        |
| Thieme<br>et al., 2020 [55] | Rat model of<br>chemotherapy-<br>induced OM | Extra-oral 6<br>J/cm <sup>2</sup> laser<br>irradiation<br><i>N</i> = 18<br><br>Extra-oral 12<br>J/cm <sup>2</sup> laser<br>irradiation        | Naïve<br><i>N</i> = 6<br><br>Untreated<br><i>N</i> = 18                                                                                                                                                                                                                                                                                              | OM scoring<br><br>Histological<br>score<br><br>Epithelial<br>nitrotyrosine<br>score                                                                                   | OM score only reduced in extra-oral 6 J/cm <sup>2</sup><br>laser irradiation at day 8 compared to untreated<br>group ( <i>p</i> < 0.05). Other modes of laser<br>irradiation reduced on days 10 and 14 ( <i>p</i> < 0.05).<br><br>Histologically there was improved epithelial<br>repair and reduced inflammation in OM in                          | Glutathione<br>peroxidase increased<br>by<br>photobiomodulation.<br>This provides better<br>neutralisation of ROS. |

|                                                            |                                                           |                                                                                                                                                                                                     |
|------------------------------------------------------------|-----------------------------------------------------------|-----------------------------------------------------------------------------------------------------------------------------------------------------------------------------------------------------|
| N = 18                                                     |                                                           | groups of all laser irradiation modalities on day 8 ( $p < 0.05$ ).                                                                                                                                 |
| Intra-oral 6 J/cm <sup>2</sup> laser irradiation<br>N = 18 | DCFH oxidation level                                      | Laser irradiation modalities similar had similar response to epithelial nitrotyrosine, catalase or glutathione levels compared to untreated mice.                                                   |
|                                                            | Glutathione peroxidase, catalase and glutathione activity | DCFH oxidation was reduced in the extra-oral 6 J/cm <sup>2</sup> laser irradiation group on day 8 compared to untreated mice ( $p < 0.05$ ).                                                        |
|                                                            |                                                           | Glutathione peroxidase activity was significantly increased for all modalities of laser irradiation only on day 8 ( $p < 0.05$ ). No difference between groups for catalase or glutathione activity |

Supplementary Table S7. Summary of *in vivo* study design and results of transplant as an interventions.

| AUTHOR, YEAR           | POPULATION      | INTERVENTION                                                          | COMPARATOR             | OUTCOME                                                                                                                               | EFFECT OBSERVED                                                                                                                         | MECHANISM OF ACTION                                                                                         |
|------------------------|-----------------|-----------------------------------------------------------------------|------------------------|---------------------------------------------------------------------------------------------------------------------------------------|-----------------------------------------------------------------------------------------------------------------------------------------|-------------------------------------------------------------------------------------------------------------|
| Shen et al., 2018 [56] | Male mice (C57) | <i>In vivo</i> transplantation of CXCR2-overexpressing MSCs.<br>N = 6 | No treatment.<br>N = 6 | ROS level measured to see protective effect of CXCR2-overexpressing MSCs transplantation against radiotherapy-induced oral mucositis. | Treatment led to significant reduction in ROS production ( $p < 0.05$ ) and accelerated healing of radiotherapy-induced oral mucositis. | Increased CXCR2 expression associated with reduction of ROS, inflammatory cytokines and improved OM healing |

Supplementary Table S8. Summary of *in vivo* study design and results of antioxidants.

| AUTHOR, YEAR                 | POPULATION                                                                                                 | INTERVENTION                                                                                                                             | COMPARATOR                                                                                              | OUTCOME                                                                                                                                                                                                           | EFFECT OBSERVED                                                                                        | MECHANISM OF ACTION                                                                                             |
|------------------------------|------------------------------------------------------------------------------------------------------------|------------------------------------------------------------------------------------------------------------------------------------------|---------------------------------------------------------------------------------------------------------|-------------------------------------------------------------------------------------------------------------------------------------------------------------------------------------------------------------------|--------------------------------------------------------------------------------------------------------|-----------------------------------------------------------------------------------------------------------------|
| Greenberger et al., 2014 [7] | Fanconi anaemia (Fancd2 <sup>-/-</sup> ) mice of six to eight weeks old.                                   | GS-nitroxide therapy (JP4-039), along with irradiation to induce oral mucositis.<br>N = Not reported                                     | Control group received F15 emulsion alone.<br>N = Not reported                                          | DNA double stranded break was measured, and histopathologic evaluation of oral mucosa was conducted to evaluate the protective effect of GS-nitroxide therapy (JP4-039) against radiation-induced oral mucositis. | GS-nitroxide therapy allowed significant reduction in radiation-induced oral mucositis ( $p < 0.05$ ). | GS-nitroxide reported for antioxidant properties but no mechanism of the oxidative stress pathway was evaluated |
| Shinde et al., 2016 [24]     | Ten – twelve-week-old Fancd2 <sup>+/+</sup> , Fancd2 <sup>+/-</sup> and Fancd2 <sup>-/-</sup> C57BL/6 mice | Radiotherapy (single 28 Gy or fractioned dose 8 Gy x 4) and administration of F15/JP4-039 nitroxide OR F15/4-amino-Tempo<br>N = 3-4 each | Radiotherapy (single 28 Gy or fractioned dose 8 Gy x 4) and administration of F15 only.<br>N = 3-4 each | Histological evaluation to investigate the protective effect of JP4-039 and 4-amino-Tempo against radiotherapy-induced oral mucositis.                                                                            | Only JP4-039 treatment led to improvement of oral mucositis ( $p < 0.0001$ ).                          | Not reported                                                                                                    |
| Willis et al., 2018 [57]     | Double-knockout [SMAD3 <sup>-/-</sup> (129/Sv)/Fancd2 <sup>-/-</sup> (129                                  | Mitochondrial-targeted GS-                                                                                                               | F15 alone<br>N = 20                                                                                     | OM severity by ulcer per oral mucosa area                                                                                                                                                                         | Reduced OM affected area percentage ( $p < 0.05$ )                                                     | No mechanism of oxidative stress pathway                                                                        |

|                          |                                                                                 |                                                                                   |                                                                                              |                                                                                                                                    |                                                                                                                                                                                                                                                                                                                                                                                                                                                                                                                                                                                                                           |                                                    |
|--------------------------|---------------------------------------------------------------------------------|-----------------------------------------------------------------------------------|----------------------------------------------------------------------------------------------|------------------------------------------------------------------------------------------------------------------------------------|---------------------------------------------------------------------------------------------------------------------------------------------------------------------------------------------------------------------------------------------------------------------------------------------------------------------------------------------------------------------------------------------------------------------------------------------------------------------------------------------------------------------------------------------------------------------------------------------------------------------------|----------------------------------------------------|
|                          | /Sv)] mice, Fancg <sup>-/-</sup> , Fanca <sup>-/-</sup> , Fancd2 <sup>-/-</sup> | nitroxide, JP4-039/F15<br>N = 20                                                  |                                                                                              | via histopathological analysis<br><br>Western blot analysis of TGF- $\beta$ pathway<br><br>RT-PCR for TGF- $\beta$ mRNA expression | Reduced irradiation-mediated TGF- $\beta$ mRNA elevation and plasma protein ( $p < 0.05$ ).                                                                                                                                                                                                                                                                                                                                                                                                                                                                                                                               | examined, but GS-nitroxide is a known antioxidant. |
| Cortim et al., 2012 [58] | Rat model of radiotherapy-induced and chemoradiotherapy-induced OM              | 137.5 or 275mg/kg tempol<br>N = 8 per group<br><br>150mg/kg D-met only<br>N = 4-8 | No irradiation and/or 5-FU<br>N = 4-8<br><br>Untreated<br>N = 4-8<br><br>L-met only<br>N = 4 | Mean ulcer size<br><br>Mean tongue epithelial thickness by histological analysis                                                   | 275mg/kg tempol reduced the fractionated dose radiation-induced ulcer size ( $p < 0.001$ ) and had higher mean epithelial thickness at 7- and 8-day post-irradiation compared to untreated ( $p < 0.001$ , each).<br><br>Chemoradiotherapy-induced ulcers were reduced in size in 137.5 and 275mg/kg tempol treatments compared to untreated groups ( $p < 0.001$ ).<br><br>D-met group showed reduced ulcer size compared to the untreated group ( $p < 0.001$ ). D-met groups had lower, but statistically insignificant ( $p > 0.05$ ), ulcer size in chemoradiotherapy mouse models, compared to the untreated group. | Not assessed, but tempol is an antioxidant.        |
| Hu et al., 2017 [59]     | Miniature pig model of radiotherapy-induced OM                                  | 30mg/kg tempol<br>N = 4                                                           | Naïve<br>N = 4                                                                               | Oral mucositis score<br><br>Percent area of ulcer                                                                                  | 30mg/kg tempol treated groups had lower oral mucositis scores at day 15                                                                                                                                                                                                                                                                                                                                                                                                                                                                                                                                                   | Not assessed, but tempol is an antioxidant.        |

|                          |                                      |                             |                           |                                                         |                                                                                                                                                                                                                                                                                  |                                                                                |
|--------------------------|--------------------------------------|-----------------------------|---------------------------|---------------------------------------------------------|----------------------------------------------------------------------------------------------------------------------------------------------------------------------------------------------------------------------------------------------------------------------------------|--------------------------------------------------------------------------------|
|                          |                                      |                             | Untreated<br><i>N</i> = 4 | Oral epithelium thickness by histological analysis      | and 18 ( $p < 0.05$ ) and had lower percent area of ulcers on the tongue ( $p < 0.05$ ).<br><br>Only the buccal epithelial thickness was higher in the tempol treated minipigs compared to the untreated group – the thickness was equivalent to the naïve group.                |                                                                                |
| Üçüncü et al., 2006 [60] | Rat model of radiotherapy-induced OM | Vitamin E<br><i>N</i> = 7   | Naïve<br><i>N</i> = 7     | Evaluation of OM severity following Parkins et al scale | Vitamin E and L-carnitine groups had a later onset of OM than untreated groups ( $p < 0.05$ ).                                                                                                                                                                                   | MDA decrease, and SOD and CAT increase in the blood plasma was associated with |
|                          |                                      | L-carnitine<br><i>N</i> = 7 | Untreated<br><i>N</i> = 7 | Histopathological assessment of oral epithelium         | Histologically, vitamin E and L-carnitine treated rats had fewer inflammatory infiltration, vacuolar alteration of basal layer and epithelial cellular changes ( $p < 0.05$ ).                                                                                                   | reduce inflammatory infiltration and delayed OM onset                          |
|                          |                                      | Mix<br><i>N</i> = 7         |                           | Assessment of MDA, SOD and CAT level from blood samples | MDA level had decreased, and SOD and CAT enzymes increased in the plasma when treated with vitamin E or L-carnitine ( $p < 0.05$ ). The same was observed with the mixed treatment ( $p < 0.05$ ); however, the decrease for MDA was statistically insignificant ( $p > 0.05$ ). |                                                                                |

Supplementary Table S9. Summary of *in vivo* study design and results of gene therapy as an intervention.

| AUTHOR, YEAR          | POPULATION                                                                      | INTERVENTION                                                                                  | COMPARATOR                                                                                             | OUTCOME                                                                   | EFFECT OBSERVED                                                                                                                                                                                                                  | MECHANISM OF ACTION                                                                                                                                                |
|-----------------------|---------------------------------------------------------------------------------|-----------------------------------------------------------------------------------------------|--------------------------------------------------------------------------------------------------------|---------------------------------------------------------------------------|----------------------------------------------------------------------------------------------------------------------------------------------------------------------------------------------------------------------------------|--------------------------------------------------------------------------------------------------------------------------------------------------------------------|
| Luo et al., 2019 [61] | Radiotherapy-induced OM female mice model with human oral tissue xenotransplant | Tat-Smad7<br><i>N</i> = Not reported                                                          | 30% glycerol in PBS vehicle control<br><i>N</i> = Not reported<br><br>Naïve<br><i>N</i> = Not reported | Tumour area                                                               | Tumour size reduced due to radiotherapy alone and with Tat-Smad7 (both $p < 0.05$ ).                                                                                                                                             | 8-OHdG, a marker of oxidative DNA damage due to ROS, was reduced and was associated with smaller ulcerative lesions following radiotherapy and Tat-Smad7 treatment |
|                       |                                                                                 |                                                                                               |                                                                                                        | Ulcer size                                                                | Ulcer size was reduced by Tat-Smad7 treatment as well ( $p < 0.05$ ).                                                                                                                                                            |                                                                                                                                                                    |
|                       |                                                                                 |                                                                                               |                                                                                                        | DNA damage assessed by pH2AX and 8-OHdG                                   | Tat-Smad7 treated mice had fewer pH2AX and 8-OHdG (both $p < 0.05$ ).                                                                                                                                                            |                                                                                                                                                                    |
|                       |                                                                                 |                                                                                               |                                                                                                        | Cell apoptosis by TUNEL labelling                                         | Tat-Smad7 treated mice had fewer TUNEL labelled cells ( $p < 0.05$ ).                                                                                                                                                            |                                                                                                                                                                    |
|                       |                                                                                 |                                                                                               |                                                                                                        | Leukocyte infiltration by F4/80 immunostaining                            | Tat-Smad7 treated mice had unchanged pH2AX expression ( $p > 0.05$ ) but increase 8-OHdG expression ( $p < 0.05$ ).                                                                                                              |                                                                                                                                                                    |
|                       |                                                                                 |                                                                                               |                                                                                                        | Cell proliferation                                                        | Intervention group had reduced F4/80+ cell density compared to vehicle control ( $p < 0.01$ ).<br><br>The intervention group oral mucosa saw more BrdU stained cells, by density counts, compared to the control ( $p < 0.01$ ). |                                                                                                                                                                    |
| Guo et al., 2003 [62] | C3H/HeNsd mice                                                                  | Plasmid/liposome complexes with Plasmid DNA of human SOD2 transgene or <i>LacZ</i> transgene. | Control mice: no treatment of plasmid DNA of human SOD2 transgene- just saline.                        | SOD2 level was measured to evaluate the protective effect of SOD2 against | SOD2 plasmid complex treatment led to significant increase in SOD2 level ( $p = 0.029$ ), and significantly decreased amount of ulceration present compared to the group that received <i>LacZ</i> -transgene ( $p = 0.04$ ).    | Increased SOD2 expression associated with reduced                                                                                                                  |

|                           |                                      |                                                          |                                                  |                                                                                                                                                 |                                                                                                                                                                                                                                                                                                                                                                                                 |                                                                                                      |
|---------------------------|--------------------------------------|----------------------------------------------------------|--------------------------------------------------|-------------------------------------------------------------------------------------------------------------------------------------------------|-------------------------------------------------------------------------------------------------------------------------------------------------------------------------------------------------------------------------------------------------------------------------------------------------------------------------------------------------------------------------------------------------|------------------------------------------------------------------------------------------------------|
|                           |                                      | N = 5-12 each                                            | N = 12                                           | radiation-induced oral mucositis.                                                                                                               |                                                                                                                                                                                                                                                                                                                                                                                                 | OM-associated ulceration                                                                             |
| Epperly et al., 2004 [63] | Rat model of radiotherapy-induced OM | Manganese superoxide dismutase-plasmid/liposome<br>N = 5 | Amifostine<br>N = 5<br><br>No treatment<br>N = 5 | Histological analysis of OM tongue tissue<br><br>Mucosal cell cycling by BuDR labelling<br><br>Saliva output<br><br>Oral mucosal cell apoptosis | Percentage of sections with ulcerated oral epithelium were reduced in MnSOD-PL treated group ( $p < 0.05$ ).<br><br>No statistically significant influence on cell cycling by MnSOD-PL treatment.<br><br>Saliva output reduction was mitigated with MnSOD-PL ( $p < 0.05$ ).<br><br>Percentage of apoptotic cells were significantly reduced in rats treated with MnSOD-PL ( $p \leq 0.0001$ ). | MnSOD plasmid treatment associated with reduction of apoptotic cell death and OM-mediated ulceration |

**Supplementary Table S10. Summary of *in vivo* study design and results of irradiation as an intervention.**

| AUTHOR, YEAR          | POPULATION                             | INTERVENTION                                         | COMPARATOR                   | OUTCOME                                                              | EFFECT OBSERVED                                                                                                                                                                                                                                                                                                                                                                                                                                                                   | MECHANISM OF ACTION                                                                               |
|-----------------------|----------------------------------------|------------------------------------------------------|------------------------------|----------------------------------------------------------------------|-----------------------------------------------------------------------------------------------------------------------------------------------------------------------------------------------------------------------------------------------------------------------------------------------------------------------------------------------------------------------------------------------------------------------------------------------------------------------------------|---------------------------------------------------------------------------------------------------|
| Tao et al., 2019 [64] | Mouse model of radiotherapy-induced OM | 3, 5 and 7 days after 25Gy irradiation<br>N = 5 each | No irradiation<br>N = 5 each | miR-200 expressions<br><br>Proinflammatory cytokine mRNA expressions | miR-200a ( $p < 0.001$ ), -200b ( $p < 0.001$ ) and -200c ( $p < 0.05$ ) were increased after 4 days irradiation compared to untreated mice. These return to levels comparable to non-irradiated group.<br><br>TNF- $\alpha$ , MIP-1 $\beta$ and IL-1 $\alpha$ expression after 7 days of irradiation compared to non-irradiated ( $p < 0.0001$ ). TGF- $\beta$ and IL-6 showed peak expression at days 5 ( $p < 0.001$ ) and 7 ( $p < 0.0001$ ) after irradiation, respectively. | miR-200 reported in the study to regulate ROS production, covered in <i>in vitro</i> experiments. |

## Clinical Studies

**Supplementary Table S11. Summary of results of Vitamin E as an intervention.**

| AUTHOR,<br>YEAR                          | STUDY<br>TYPE                                     | POPULATION                                                                              | INTERVENTION                                                                           | COMPARATOR                                         | OUTCOME                                                                                                                                                                                     | EFFECT OBSERVED                                                                                                                                                                                         | MECHANISM<br>OF ACTION                    |
|------------------------------------------|---------------------------------------------------|-----------------------------------------------------------------------------------------|----------------------------------------------------------------------------------------|----------------------------------------------------|---------------------------------------------------------------------------------------------------------------------------------------------------------------------------------------------|---------------------------------------------------------------------------------------------------------------------------------------------------------------------------------------------------------|-------------------------------------------|
| Sung et al.<br>2007 [65]                 | Series of<br>N-of-1<br>double-<br>blinded<br>RCTs | Children between<br>6-17 years old<br>undergoing CT<br><i>N</i> = 53                    | Vitamin E 800mg<br><i>N</i> = 22                                                       | Placebo<br><i>N</i> = 23                           | OM assessed according to<br>scale developed by Sonis et<br>al.                                                                                                                              | No significant difference in<br>objective mucositis scores<br>between the intervention<br>group (0.2) and the control<br>group (0.3).                                                                   | Antioxidant<br>activity                   |
| Ferreira et<br>al., 2004<br>[66]         | Double-<br>blind<br>RCT                           | Patients with<br>cancer of the oral<br>cavity and<br>oropharynx<br><i>N</i> = 54        | Vitamin E (alpha-<br>tocopherol, 400mg)<br><i>N</i> = 28                               | 500mg placebo<br><i>N</i> = 26                     | OM via toxicity criteria of the<br>Radiation Therapy Oncology<br>Group and the European<br>Organization for Research<br>and Treatment of Cancer<br>(RTOG/EORTC) objective<br>grading system | Symptomatic OM more<br>frequent in the placebo group<br>than in the VE group ( <i>p</i> =<br>0.038)<br>Subjective pain scores<br>indicated VE reduced pain<br>grades during RT ( <i>p</i> =<br>0.0001). | Vitamin E has<br>antioxidant<br>activity. |
| El-<br>Housseiny<br>et al., 2007<br>[67] | RCT                                               | Paediatric patients<br>undergoing<br>chemotherapy<br>with OM<br><i>N</i> = 80           | Vitamin E topically<br>b.i.d. (100mg)<br><i>N</i> = 40                                 | Vitamin E<br>systemically<br><i>N</i> = 40         | OM via WHO oral toxicity<br>scale                                                                                                                                                           | 80% of treated with VE<br>topically had complete<br>resolution of OM after 5<br>days, whereas 93.9% of those<br>in the systemic<br>administration group had<br>failed to improve in OM<br>grade.        |                                           |
| Wadleigh<br>et al., 1992<br>[68]         | Double-<br>blind<br>RCT                           | Patients receiving<br>chemotherapy to<br>treat various<br>malignancies<br><i>N</i> = 18 | topical vitamin E<br>oil (1ml,<br>400mg/mL), on<br>oral lesions, b.i.d<br><i>N</i> = 9 | Placebo (coconut<br>+ soybean oil)<br><i>N</i> = 9 | OM via WHO oral toxicity<br>scale                                                                                                                                                           | 6 out of 9 of the VE group<br>had full recovery of OM,<br>whereas the control group<br>had 8 out of 9 subjects did<br>not recover, difference<br>statistically significant ( <i>p</i> =<br>0.025).      |                                           |

| <i>Pentoxifylline + Vit E</i>                                                          |                           |                                                                                                    |                                                                                           |                                                                                  |                                                                                                                               |                                                                                                                                                                                                                                                                                                                                                                    |                                                                                                                                                                             |
|----------------------------------------------------------------------------------------|---------------------------|----------------------------------------------------------------------------------------------------|-------------------------------------------------------------------------------------------|----------------------------------------------------------------------------------|-------------------------------------------------------------------------------------------------------------------------------|--------------------------------------------------------------------------------------------------------------------------------------------------------------------------------------------------------------------------------------------------------------------------------------------------------------------------------------------------------------------|-----------------------------------------------------------------------------------------------------------------------------------------------------------------------------|
| Sayed et al., 2019 [69]                                                                | Prospective RCT           | H&N cancer patients receiving 30-35 RT fractions with or without CT were included<br><i>N</i> = 60 | Pentoxifylline and vitamin E<br><i>N</i> = 30                                             | No pentoxifylline nor vit E<br><i>N</i> = 30                                     | Severity of oral symptoms graded using national cancer institute common terminology criteria for adverse events version 4.03. | Pentoxifylline and vitamin E did not affect the incidence of OM, however, after adjusting for age, it decreased the incidence of severe OM ( <i>p</i> = 0.01) and decreased the duration of OM by 5 weeks ( <i>p</i> = 0.002).                                                                                                                                     | Pentoxifylline is non-specific phosphodiesterase inhibitor that blocks transcription of TGF- $\beta$ 1; Vit E is an antioxidant that inhibits production of TGF- $\beta$ 1. |
| <i>Azelastine (2 mg) + vitamin C (500 mg) + vitamin E (200) + glutathione (200 mg)</i> |                           |                                                                                                    |                                                                                           |                                                                                  |                                                                                                                               |                                                                                                                                                                                                                                                                                                                                                                    |                                                                                                                                                                             |
| Osaki et al., 1994 [6]                                                                 | Controlled Clinical Trial | Patients receiving chemotherapy<br><i>N</i> = 63                                                   | Azelastine (2mg), vitamin C 500mg, vitamin E 200mg and glutathione 200mg<br><i>N</i> = 37 | Control: vitamin C 500mg, vitamin E 200mg and glutathione 200mg<br><i>N</i> = 26 | OM graded based on erythema, severity of ulceration and effect on patient diet                                                | Inflammation occurred later and less severely in the Azelastine group. (p not reported)<br>The control group required longer for Grade 4 OM to resolve. ( <i>p</i> < 0.05)<br>O <sub>2</sub> <sup>-</sup> generation was lower in the Azelastine group ( <i>p</i> < 0.05), no correlation was found between O <sub>2</sub> <sup>-</sup> levels and severity of OM. | Azelastine stabilises cell membrane, has capacity to suppress leukocytes. vitamin C and vitamin E have antiradical activities. Glutathione reduces oxidants.                |
| <i>Treatment combining Vit E, triamcinolone and hyaluronic acid</i>                    |                           |                                                                                                    |                                                                                           |                                                                                  |                                                                                                                               |                                                                                                                                                                                                                                                                                                                                                                    |                                                                                                                                                                             |
| Agha-Hosseini et al., 2021 [70]                                                        | Triple-blind RCT          | Patients with H&N cancer undergoing RT on an outpatient basis<br><i>N</i> = 60                     | Mouthwash containing Vitamin E 0.2%, Triamcinolone 0.1%, and                              | Triamcinolone mouthwash 0.1%<br><i>N</i> = 30                                    | Severity of OM determined by WHO classification and pain intensity measured by numerical pain intensity scale                 | Significant higher reduction in OM grade ( <i>p</i> < 0.001) and pain intensity ( <i>p</i> < 0.001) in the intervention group.                                                                                                                                                                                                                                     | Antioxidant, anti-inflammatory, and improved healing process mechanisms.                                                                                                    |

|                                             |                  |                                                 |                                                                                |                                        |                                                                                                                                          |                                                                                                                                                                                 |                                             |
|---------------------------------------------|------------------|-------------------------------------------------|--------------------------------------------------------------------------------|----------------------------------------|------------------------------------------------------------------------------------------------------------------------------------------|---------------------------------------------------------------------------------------------------------------------------------------------------------------------------------|---------------------------------------------|
| Hyaluronic acid<br>0.2%<br>N = 29           |                  |                                                 |                                                                                |                                        |                                                                                                                                          |                                                                                                                                                                                 |                                             |
| Vitamin E vs Pycnogenol (Pine bark extract) |                  |                                                 |                                                                                |                                        |                                                                                                                                          |                                                                                                                                                                                 |                                             |
| Khurana et al., 2013 [71]                   | Single Blind RCT | Children with chemotherapy induced OM<br>N = 72 | Group II: Vitamin E (200mg) (n=24)<br>Group III: Pycnogenol (1mg/kg)<br>N = 24 | Group I: Control (Glycerine)<br>N = 24 | OM via WHO oral toxicity scale, Oral Mucositis Assessment Scale (OMAS), and Children's International Mucositis Evaluation Scale (ChIMES) | Statistically, both intervention arms were equivalent in effect - both treatments reduced severity of OM and pain was reduced regardless of treatment modality. ( $p = 0.998$ ) | Both interventions are strong antioxidants. |

**Supplementary Table S12. Summary of results of Genetic Influences and Inherent Antioxidants.**

| AUTHOR, YEAR                | STUDY TYPE          | POPULATION                                                                                            | INTERVENTION  | COMPARATOR        | OUTCOME                                                                                                            | EFFECT OBSERVED                                                                                                                          | MECHANISM OF ACTION                                                                                          |
|-----------------------------|---------------------|-------------------------------------------------------------------------------------------------------|---------------|-------------------|--------------------------------------------------------------------------------------------------------------------|------------------------------------------------------------------------------------------------------------------------------------------|--------------------------------------------------------------------------------------------------------------|
| Venkatesh et al., 2014 [72] | Observational       | H&N cancer patients undergoing chemo-radiotherapy or RT<br>N = 183                                    | Post chemo/RT | Prior to chemo/RT | Degree of OM assessed according to RTOG and genetic polymorphism via genomic DNA isolation                         | NBN variants are of predictive significance ( $p = 0.023$ ) in analysing oral mucositis prior to radiotherapy.                           | SNPs in specific genes relate to DNA damage and repair, serve as a biomarker for predicting tissue toxicity. |
| Pratesi et al., 2011 [73]   | Observational Study | Patients with squamous cell carcinoma of the head and neck (SCCHN) after radiotherapy (RT)<br>N = 101 |               |                   | Genetic polymorphisms detected via high resolution melting analysis (HRMA) Radiation induced toxicities via Common | XRCC1-399Gln allele significantly associated with higher risk of OM ( $p = 0.011$ )<br>Development of grade $\geq 2$ OM was increased in | Genes tested are protective against oxidative stress.                                                        |

|                             |                                  |                                                                                                                                   |          |              |                                                                                                  |                                                                                                                                                                                                                                                                                                                                                                                   |                                          |
|-----------------------------|----------------------------------|-----------------------------------------------------------------------------------------------------------------------------------|----------|--------------|--------------------------------------------------------------------------------------------------|-----------------------------------------------------------------------------------------------------------------------------------------------------------------------------------------------------------------------------------------------------------------------------------------------------------------------------------------------------------------------------------|------------------------------------------|
|                             |                                  |                                                                                                                                   |          |              | Toxicity Criteria for Adverse Events (CTCAE)                                                     | patients with the XRCC1-399G1n allele. ( $p = 0.001$ )<br>The presence of one or more SNP in XRCC1 p.G1n399Arg/RAD51 c.-3429 G > C was associated with a higher likelihood of acute toxicities. ( $p = 0.004$ )                                                                                                                                                                   |                                          |
| Urbain et al., 2012 [74]    | Prospective study                | Adults (haematological malignancies) treated with allogeneic haematopoietic cell transfer (alloHCT) with chemotherapy<br>$N = 70$ |          |              | Severity of OM via WHO oral toxicity scale<br>AOX status in buccal mucosa cells (BMC) and plasma | There was no significant difference found in baseline AOX concentrations between the patients with various severities of OM. ( $p$ value not reported)<br>Tendency for patients with sub-normal AOX levels to require a longer duration of parenteral nutrition. ( $p = 0.066$ )<br>No single AOX had predictive value for incidence or severity of OM. ( $p$ value not reported) |                                          |
| Wardman et al., 2013 [75]   | Observational Study              | Patients with carcinomas of the head and neck treated with CHART (radiotherapy)<br>$N = 18$                                       |          |              | Glutathione, cysteine, urate, and ascorbate measured in plasma.<br>OM distribution               | There was no correlation found between mucositis severity and measures of plasma AOX. ( $p = 0.12$ )                                                                                                                                                                                                                                                                              |                                          |
| Bachmeier et al., 2014 [76] | Longitudinal observational study | Bone marrow transplant patients<br>$N = 20$                                                                                       | Post BMT | Prior to BMT | Superoxide dismutase and Uric acid activity using RANDOX and UOD/ PAP                            | Post BMT, 85% developed OM, increase in SOD ( $p < 0.01$ ) and                                                                                                                                                                                                                                                                                                                    | SOD regarded as OM defence mechanism; UA |

|                           |                            |                                                                                    |                |               |                                                                                                      |                                                                                                                                                             |                                   |
|---------------------------|----------------------------|------------------------------------------------------------------------------------|----------------|---------------|------------------------------------------------------------------------------------------------------|-------------------------------------------------------------------------------------------------------------------------------------------------------------|-----------------------------------|
|                           |                            |                                                                                    |                |               | spectrophotometry, respectively. OM using WHO classification                                         | decrease in UA ( $p < 0.001$ ) during M-stage.                                                                                                              | level reflects progression of OM. |
| Severin et al., 2005 [77] | Human in vitro and in vivo | Leukemia patients receiving BMT ( $N = 40$ ) and healthy blood donors ( $N = 67$ ) | Post-radiation | Pre-radiation | Leukocytes of CD34+ HBSC, lymphocytes and plasma antioxidant concentration using ABTS and FRAP assay | Severe OM associated with specific depletion in leukocyte ( $p = 0.008$ ), lymphocyte ( $p = 0.008$ ) and plasma antioxidant concentration ( $p < 0.001$ ). |                                   |

**Supplementary Table S13. Summary of results of rebamipide as an intervention.**

| AUTHOR, YEAR                | STUDY TYPE           | POPULATION                                                  | INTERVENTION                         | COMPARATOR              | OUTCOME                                                                                     | EFFECT OBSERVED                                                                                                                                  | MECHANISM OF ACTION                 |
|-----------------------------|----------------------|-------------------------------------------------------------|--------------------------------------|-------------------------|---------------------------------------------------------------------------------------------|--------------------------------------------------------------------------------------------------------------------------------------------------|-------------------------------------|
| Chaitanya et al., 2017 [78] | Double blind RCT     | Chemo-radiotherapy patients $N = 60$                        | Rebamipide gargle 100mg/day $N = 30$ | Placebo gargle $N = 30$ | Degree of OM assessed subjectively by Numeric rating scale and objectively via RTOG grading | Rebamipide led to decreased severity ( $p = 0.001$ ) and pain intensity ( $p = 0.001$ ), delayed onset ( $p = 0.012$ ).                          | Antioxidant properties              |
| Ishii, 2017 [79]            | Non-controlled trial | Patients with stomatitis who underwent chemotherapy $N = 5$ | Rebamipide mouthwash (25mL)          |                         | OM via National Cancer Institute's Common Terminology Criteria for Adverse Events (CTCAE)   | 3/5 patients' stomatitis evaluation score (SES) reached 0. Remaining patients experienced an improvement of SES score. ( $p$ value not reported) | Rebamipide inhibits ROS generation. |

**Supplementary Table S14. Summary of results of zinc/polaprezinc as an intervention.**

| AUTHOR, YEAR                 | STUDY TYPE        | POPULATION                                                           | INTERVENTION                              | COMPARATOR                                                              | OUTCOME                                                                        | EFFECT OBSERVED                                                                           | MECHANISM OF ACTION                                 |
|------------------------------|-------------------|----------------------------------------------------------------------|-------------------------------------------|-------------------------------------------------------------------------|--------------------------------------------------------------------------------|-------------------------------------------------------------------------------------------|-----------------------------------------------------|
| Gholizadeh et al., 2017 [80] | Double-blind RCT  | Patients with acute myeloid leukemia undergoing CT<br>N = 140        | Zinc sulfate 220mg orally<br>N = 70       | Placebo capsule<br>N = 70                                               | OM severity according to WHO.                                                  | Frequency of severe OM reduced in treatment compared to control group ( $p = 0.004$ ).    | Antioxidant and protective agent                    |
| Doi et al., 2015 [81]        | Prospective study | Newly diagnosed patients with H&N cancer and undergoing RT<br>N = 32 | Polaprezinc mouthwash 150mg/day<br>N = 32 | Past H&N cancer patients<br>N = 30<br>who underwent RT without PZ rinse | Severity of OM using Common Terminology Criteria for Adverse Events, version 3 | PZ group had decreased incidence of grade 3 OM ( $p = 0.18$ ), PZ also promoted recovery. | Antioxidant properties and scavenges free radicals. |

Supplementary Table S15. Summary of results of selenium as an intervention.

| AUTHOR, YEAR                           | STUDY TYPE                       | POPULATION                                                                                                        | INTERVENTION                                          | COMPARATOR            | OUTCOME                                                                | EFFECT OBSERVED                                                                                                                                                                                                                                                                 | MECHANISM OF ACTION                                                                                                             |
|----------------------------------------|----------------------------------|-------------------------------------------------------------------------------------------------------------------|-------------------------------------------------------|-----------------------|------------------------------------------------------------------------|---------------------------------------------------------------------------------------------------------------------------------------------------------------------------------------------------------------------------------------------------------------------------------|---------------------------------------------------------------------------------------------------------------------------------|
| Büntzel et al., 2010 [82]              | Randomised observational studies | RT patients<br>N = 121                                                                                            | Selenium 500ug RT days and 300ug on weekend<br>N = 63 | No selenium<br>N = 64 | Selenium serum concentration measured by Atom Absorption Spectrometry. | Decrease of selenium concentration at 50% and end of RT ( $p < 0.0001$ ). At beginning and 6 weeks post radiation no significant differences between groups was observed.                                                                                                       | Selenium is essential cofactor of the glutathione peroxidase which is important for endogenous detoxification of free radicals. |
| Jahangard-Rafsanjani et al., 2013 [83] | Double blind, RCT                | Leukaemia patients undergoing hematopoietic stem cell transfer (HSCT) with high-dose chemotherapy (HDC)<br>N = 77 | Selenium 200mcg b.i.d. for 14 days<br>N = 38          | Placebo<br>N = 39     | OM incidence and grade via WHO oral toxicity scale, Glu.Px activity    | Cumulative incidence and duration not significantly different between groups. ( $p = 0.76$ )<br>Occurrence of Severe OM significantly reduced in Selenium group. ( $p = 0.013$ )<br>Time taken to improve from grade 4 to grade 2 OM shorter in selenium group. ( $p = 0.014$ ) | Selenium is a cofactor for Glu.Px, a free radical scavenger.                                                                    |

Glu.Px ( $p = 0.008$ ) and  
selenium ( $p = 0.018$ ) elevated  
in serum of intervention.

Supplementary Table S16. Summary of results of photobiomodulation as an intervention.

| AUTHOR,<br>YEAR               | STUDY<br>TYPE                       | POPULATION                                                                                                                                                                                                                               | INTERVENTION       | COMPARATOR | OUTCOME                                                                                                                                                                                                                                                                                                               | EFFECT OBSERVED                                                                                                                                                                                                                                        | MECHANISM OF<br>ACTION                                                                                                                                                                |
|-------------------------------|-------------------------------------|------------------------------------------------------------------------------------------------------------------------------------------------------------------------------------------------------------------------------------------|--------------------|------------|-----------------------------------------------------------------------------------------------------------------------------------------------------------------------------------------------------------------------------------------------------------------------------------------------------------------------|--------------------------------------------------------------------------------------------------------------------------------------------------------------------------------------------------------------------------------------------------------|---------------------------------------------------------------------------------------------------------------------------------------------------------------------------------------|
| Rupel et<br>al., 2018<br>[20] | Human<br>in vivo<br>and in<br>vitro | Patients affected by<br>grade 2 or 3 OM<br>aged between 40-95<br>years, diagnosed<br>with solid or<br>haematologic<br>malignancy<br>undergoing CT<br>and/or RT, and<br>available to<br>undergo PBM for 4<br>consecutive days<br>$N = 10$ | Photobiomodulation | No PBM     | Oxidative stress status<br>measured in saliva<br>using TOS method,<br>evaluation of<br>intracellular ROS<br>production and kinetics<br>in PMN, real-time<br>quantification of<br>oxidative stress,<br>keratinocyte viability<br>and oxidative stress<br>assay following<br>chemotherapy, gene<br>expression analysis. | 660nm laser light increases<br>ROS, whereas the 970nm<br>light exerted a moderate<br>antioxidant activity ( $p < 0.0001$ ). The 800nm light or<br>the combination of the 3<br>wavelengths resulted in<br>the largest ROS reduction<br>( $p < 0.001$ ). | Red and near-infrared<br>light at low irradiance<br>excites cytochrome c<br>oxidase which<br>represents the main<br>source of intracellular<br>ROS generation in the<br>mitochondria. |

Supplementary Table S17. Summary of results of hyaluronic acid-based compound as an intervention.

| AUTHOR,<br>YEAR | STUDY<br>TYPE | POPULATION | INTERVENTION | COMPARATOR | OUTCOME | EFFECT OBSERVED | MECHANISM<br>OF ACTION |
|-----------------|---------------|------------|--------------|------------|---------|-----------------|------------------------|
|-----------------|---------------|------------|--------------|------------|---------|-----------------|------------------------|

|                              |                  |                                                                                                            |                    |                   |                                                                  |                                                                                                                                                                                                                         |
|------------------------------|------------------|------------------------------------------------------------------------------------------------------------|--------------------|-------------------|------------------------------------------------------------------|-------------------------------------------------------------------------------------------------------------------------------------------------------------------------------------------------------------------------|
| Cirillo et al., 2015 [19]    | Case series      | Patients receiving radio- and/or chemotherapy<br>N = 5                                                     | Mucosamine         | -                 | OM via visual analogue scale                                     | Prevention or reduced grading of OM following Mucosamin spray application, thrice daily, for 4 days prior to every chemo- and/or radiotherapy cycle.                                                                    |
| Bardellini et al., 2016 [84] | Double-blind RCT | Paediatric patients receiving chemotherapy for acute lymphoblastic leukemia with OM grade 1 or 2<br>N = 56 | Mucosyte<br>N = 28 | Placebo<br>N = 28 | OM via WHO oral toxicity scale<br>Pain via Visual Analogue Scale | The intervention arm had a statistically significant decline of OM after 3 days ( $p = 0.0038$ ), and a statistically significant difference in pain reduction compared to the control at 3 and 8 days ( $p < 0.005$ ). |

**Supplementary Table S18. Summary of results of Genistein (soy isoflavones) as an intervention.**

| AUTHOR, YEAR                | STUDY TYPE  | POPULATION                                      | INTERVENTION                          | COMPARATOR                       | OUTCOME                          | EFFECT OBSERVED                                                                                                                                                                                         | MECHANISM OF ACTION                 |
|-----------------------------|-------------|-------------------------------------------------|---------------------------------------|----------------------------------|----------------------------------|---------------------------------------------------------------------------------------------------------------------------------------------------------------------------------------------------------|-------------------------------------|
| Tacyildiz et al., 2010 [85] | Pilot study | Children receiving chemo±radio-therapy<br>N = 6 | Genistein supplement (8mg) once daily | No treatment (cross-over design) | Duration of adverse effects (OM) | Patients experienced less OM when treated with genistein during chemotherapy. Serum levels of genistein during treatment were 2-6 times higher than prior to supplementation. ( $p$ value not reported) | Genistein has antioxidant capacity. |

**Supplementary Table S19. Summary of results of Actovegin as an intervention.**

| AUTHOR, YEAR         | STUDY TYPE | POPULATION                                                                  | INTERVENTION                               | COMPARATOR                       | OUTCOME                                                                   | EFFECT OBSERVED                                                                                                         | MECHANISM OF ACTION |
|----------------------|------------|-----------------------------------------------------------------------------|--------------------------------------------|----------------------------------|---------------------------------------------------------------------------|-------------------------------------------------------------------------------------------------------------------------|---------------------|
| Wu et al., 2010 [86] | RCT        | Nasopharyngeal carcinoma patients receiving concomitant chemoradiotherapy ± | Actovegin (1200mg) as Prevention<br>N = 53 | Control (No Treatment)<br>N = 51 | OM via National Cancer Institute's Common Toxicity Criteria (NCI CTC 2.0) | Intervention arms had fewer incidences of grade 2 OM (73.6% and 35.9% compared to 92.3%). ( $p = 0.023$ , $p = 0.035$ ) |                     |

|                                   |                     |                                             |                                                                                                                                                                                                                                          |
|-----------------------------------|---------------------|---------------------------------------------|------------------------------------------------------------------------------------------------------------------------------------------------------------------------------------------------------------------------------------------|
| induction chemotherapy<br>N = 156 | Treatment<br>N = 51 | Pain via Verbal<br>Rating Scale<br>Criteria | Grade 3 OM incidence lower<br>for the prevention arm (26.4%)<br>compared to the control<br>(55.8%). ( $p = 0.002$ )<br>Actovegin reduced patient<br>grading of pain when used as a<br>prevention, but not as therapy.<br>( $p = 0.011$ ) |
|-----------------------------------|---------------------|---------------------------------------------|------------------------------------------------------------------------------------------------------------------------------------------------------------------------------------------------------------------------------------------|

**Supplementary Table S20. Summary of results of GC4419 as an intervention.**

| AUTHOR,<br>YEAR                  | STUDY<br>TYPE                            | POPULATION                                                                   | INTERVENTION                                   | COMPARATO<br>R      | OUTCOME                           | EFFECT OBSERVED                                                                                                                                                                                          | MECHANISM OF<br>ACTION                                                                                                      |
|----------------------------------|------------------------------------------|------------------------------------------------------------------------------|------------------------------------------------|---------------------|-----------------------------------|----------------------------------------------------------------------------------------------------------------------------------------------------------------------------------------------------------|-----------------------------------------------------------------------------------------------------------------------------|
| Anderson<br>et al., 2019<br>[87] | Phase<br>IIb,<br>double-<br>blind<br>RCT | Patients with locally<br>advanced oral or<br>oropharyngeal cancer<br>N = 223 | GC4419 30mg<br>N = 73<br><br>or 90mg<br>N = 76 | No GC4419<br>N = 74 | OM severity<br>by WHO<br>criteria | Dose of 30mg produced<br>intermediate improvements, and<br>at a dose of 90mg produced<br>reduced duration ( $p = 0.024$ ),<br>incidence ( $p = 0.009$ ) and<br>severity ( $p = 0.045$ ) of severe<br>OM. | Superoxide dismutase<br>mimetic. It rapidly<br>converts $O_2^{*-}$ to $H_2O_2$ , to<br>arrest initiation of ROS<br>cascade. |

**Supplementary Table S21. Summary of allopurinol as an intervention.**

| AUTHOR,<br>YEAR               | STUDY<br>TYPE | POPULATION                                                       | INTERVENTION                      | COMPARATOR                      | OUTCOME                                                               | EFFECT OBSERVED                                                               | MECHANISM<br>OF ACTION                |
|-------------------------------|---------------|------------------------------------------------------------------|-----------------------------------|---------------------------------|-----------------------------------------------------------------------|-------------------------------------------------------------------------------|---------------------------------------|
| Yokomizo et<br>al., 2004 [88] | RCT           | Patients with<br>advanced or recurrent<br>colon cancer<br>N = 52 | Allopurinol ice<br>10mL<br>N = 20 | No allopurinol<br>ice<br>N = 32 | Stomatitis was<br>analysed via a grading<br>system (not<br>mentioned) | Allopurinol led to a<br>decreased incidence and<br>severity ( $p = 0.0187$ ). | Inhibition of<br>xanthine<br>oxidase. |

**Supplementary Table S22. Summary of results of erythropoietin as an intervention.**

| AUTHOR, YEAR                  | STUDY TYPE       | POPULATION                                                                                                   | INTERVENTION                               | COMPARATOR                  | OUTCOME                                                                                       | EFFECT OBSERVED                                                                                                                | MECHANISM OF ACTION                               |
|-------------------------------|------------------|--------------------------------------------------------------------------------------------------------------|--------------------------------------------|-----------------------------|-----------------------------------------------------------------------------------------------|--------------------------------------------------------------------------------------------------------------------------------|---------------------------------------------------|
| Hosseinjani et al., 2017 [89] | Double-blind RCT | Adults with non-Hodgkin's lymphoma, Hodgkin disease or multiple myeloma undergoing autologous HSCT<br>N = 80 | Erythropoietin mouthwash 50IU/ml<br>N = 40 | Placebo mouthwash<br>N = 40 | World Health Organization oral toxicity scale to measure OM incidence, duration, and severity | Significantly significant reduction in the incidence ( $p < 0.001$ ) and duration ( $p < 0.001$ ) of OM in intervention group. | Anti-inflammatory, antioxidant, and wound healing |

**Supplementary Table S23. Summary of results of glutamine as an intervention.**

| AUTHOR, YEAR                      | STUDY TYPE          | POPULATION                                                                         | INTERVENTION                                                | COMPARATOR           | OUTCOME                     | EFFECT OBSERVED                                                                                                                                                                                                     | MECHANISM OF ACTION  |
|-----------------------------------|---------------------|------------------------------------------------------------------------------------|-------------------------------------------------------------|----------------------|-----------------------------|---------------------------------------------------------------------------------------------------------------------------------------------------------------------------------------------------------------------|----------------------|
| Vidal-Casariago et al., 2013 [90] | Retrospective study | Patients treated with RT for H&N or cancer in chest area from 2008-2010<br>N = 117 | Glutamine 30g/day received early (27.4%) or delayed (49.5%) | No glutamine (23.1%) | OM severity by WHO criteria | Risk difference of -9.0% (95% CI = -18.0% to -1.0%) for developing OM in the intervention compared to control group, and -14.0% (95% CI = -26.0% to -1.0%) for developing ARIE in intervention compared to control. | Antioxidant activity |

**Supplementary Table S24. Summary of results of N-acetyl cysteine as an intervention.**

| AUTHOR, YEAR              | STUDY TYPE       | POPULATION                                                      | INTERVENTION                                               | COMPARATOR        | OUTCOME                                             | EFFECT OBSERVED                                                             | MECHANISM OF ACTION                      |
|---------------------------|------------------|-----------------------------------------------------------------|------------------------------------------------------------|-------------------|-----------------------------------------------------|-----------------------------------------------------------------------------|------------------------------------------|
| Moslehi et al., 2014 [91] | Double blind RCT | Adult patients with AML, ALL, or myelodysplastic syndrome (MDS) | N-Acetyl Cysteine (NAC) 100mg/kg/day for 15 days<br>N = 38 | Placebo<br>N = 42 | OM incidence and grade via WHO oral toxicity scale, | OM incidence was not significantly different between groups. ( $p = 0.34$ ) | NAC stimulates synthesis of glutathione, |

|                                                                                      |                 |                                                                                                                                                                                                                                                                                           |                          |
|--------------------------------------------------------------------------------------|-----------------|-------------------------------------------------------------------------------------------------------------------------------------------------------------------------------------------------------------------------------------------------------------------------------------------|--------------------------|
| undergoing hematopoietic stem cell transfer (HSCT) with high-dose chemotherapy (HDC) | Glu.Px activity | Severe OM occurred less frequently in the NAC group to a significant extent ( $p = 0.04$ ).<br>Mean duration of OM was significantly reduced in the NAC group. ( $p = 0.02$ )<br>Serum levels of Glu.Px were significantly higher in the NAC group 7 days following HSCT ( $p = 0.003$ ). | scavenges free radicals. |
|--------------------------------------------------------------------------------------|-----------------|-------------------------------------------------------------------------------------------------------------------------------------------------------------------------------------------------------------------------------------------------------------------------------------------|--------------------------|

**Supplementary Table S25. Summary of results of propolis as an intervention.**

| AUTHOR, YEAR             | STUDY TYPE        | POPULATION                                                             | INTERVENTION                                                 | COMPARATOR        | OUTCOME                                      | EFFECT OBSERVED                                                                                                                                                                                                                                                  | MECHANISM OF ACTION                                                                   |
|--------------------------|-------------------|------------------------------------------------------------------------|--------------------------------------------------------------|-------------------|----------------------------------------------|------------------------------------------------------------------------------------------------------------------------------------------------------------------------------------------------------------------------------------------------------------------|---------------------------------------------------------------------------------------|
| Salehi et al., 2018 [92] | Double blind, RCT | Patients with colon cancer being treated with folfox diet.<br>$N = 50$ | 50 mg propolis tablet, b.i.d. daily, for 21 days<br>$N = 25$ | Placebo<br>$N=25$ | OM incidence and grade via WHO oral toxicity | Significant difference in the mean severity of OM in the propolis group relative to the placebo group. ( $p = 0.027$ )<br>OM grade was significantly lower in the 2nd and 3rd follow up evaluations of the propolis group than the placebo group ( $p < 0.05$ ). | Propolis previously demonstrated effective against oxidative stress in animal trials. |

**Supplementary Table S26. Summary of results of MF 5232 as an intervention.**

| AUTHOR, YEAR            | STUDY TYPE       | POPULATION                              | INTERVENTION                                        | COMPARATOR          | OUTCOME                        | EFFECT OBSERVED                                            | MECHANISM OF ACTION               |
|-------------------------|------------------|-----------------------------------------|-----------------------------------------------------|---------------------|--------------------------------|------------------------------------------------------------|-----------------------------------|
| Naidu et al., 2005 [93] | Double-blind RCT | Patients with chemoradiation-induced OM | MF 5232, three times daily with food for 10-15 days | Placebo<br>$N = 11$ | OM via WHO oral toxicity scale | Improvement in OM grade with intervention ( $p = 0.007$ ). | MF 5232 has antioxidant activity. |

N = 22

N = 11

Supplementary Table S27. Summary of results of melatonin as an intervention.

| AUTHOR, YEAR               | STUDY TYPE | POPULATION                                                           | INTERVENTION                                                             | COMPARATOR                                                                                                                                   | OUTCOME                                                                                                                                                    | EFFECT OBSERVED                                                                                                                                                                                                                                                                                                                                                      | MECHANISM OF ACTION                                                 |
|----------------------------|------------|----------------------------------------------------------------------|--------------------------------------------------------------------------|----------------------------------------------------------------------------------------------------------------------------------------------|------------------------------------------------------------------------------------------------------------------------------------------------------------|----------------------------------------------------------------------------------------------------------------------------------------------------------------------------------------------------------------------------------------------------------------------------------------------------------------------------------------------------------------------|---------------------------------------------------------------------|
| Elsabagh et al., 2019 [94] | RCT        | Head and neck cancer (HNC) patients receiving radiotherapy<br>N = 40 | Melatonin (20mg) per nocte for 6 weeks + symptomatic treatment<br>N = 20 | Symptomatic treatment (antifungals, topical anaesthetics, anti-inflammatories, topical analgesics, and sodium carbonate mouthwash)<br>N = 18 | OM via WHO oral toxicity scale<br>Discomfort and pain severity using the Numeric Rating Scale (NRS)<br>Total<br>Antioxidant Capacity (TAC) via colorimetry | OM grading distribution was comparable between control and intervention, however there were fewer samples of higher grading in the intervention arm than the control.<br><br>Discomfort and pain (evaluated through the NRS) was lower for the melatonin group compared to the control. ( $p < 0.001$ )<br><br>TAC in the control group was reduced. ( $p = 0.004$ ) | Melatonin a potent antioxidant capable of scavenging free radicals. |

Supplementary Table S28. Summary of results of date palm pollen as an intervention.

| AUTHOR, YEAR             | STUDY TYPE | POPULATION                                                                   | INTERVENTION                      | COMPARATOR                                                                                             | OUTCOME                                                                      | EFFECT OBSERVED                                                                                          | MECHANISM OF ACTION                                                     |
|--------------------------|------------|------------------------------------------------------------------------------|-----------------------------------|--------------------------------------------------------------------------------------------------------|------------------------------------------------------------------------------|----------------------------------------------------------------------------------------------------------|-------------------------------------------------------------------------|
| Elkerm et al., 2014 [95] | RCT        | Patients with H&N cancer prior to exposure to first-line treatment<br>N = 20 | Date palm pollen 2g/day<br>N = 10 | Oral antifungal, rebamipide for mucosal restoration, and local and oral analgesics as needed<br>N = 10 | Assessment of oral tissues performed using OMAS, digital photographs and VAS | DPP associated with significantly ( $p$ -values unspecified) reduced OMAS score and pain severity of OM. | Blocks oxidative free radicals, prevents DNA damage, anti-inflammatory. |

**Supplementary Table S29. Summary of results of  $\beta$ -carotene as an intervention.**

| AUTHOR, YEAR     | STUDY TYPE | POPULATION                                                                       | INTERVENTION                                              | COMPARATOR                                     | OUTCOME                                                                       | EFFECT OBSERVED                                                                                                                                                                                      | MECHANISM OF ACTION                                            |
|------------------|------------|----------------------------------------------------------------------------------|-----------------------------------------------------------|------------------------------------------------|-------------------------------------------------------------------------------|------------------------------------------------------------------------------------------------------------------------------------------------------------------------------------------------------|----------------------------------------------------------------|
| Mills, 1998 [96] | RCT        | Patients with advanced SCC of the mouth undergoing chemotherapy<br><i>N</i> = 20 | Standard diet + beta-carotene supplement<br><i>N</i> = 10 | Standard diet (no supplement)<br><i>N</i> = 10 | OM via the Tygerberg Hospital Head and Neck Oncology Clinic OM grading system | In grade 3 & 4 OM, patients in the intervention arm developed severe OM later relative to controls. ( <i>p</i> < 0.025)<br>Reactions were less severe when compared to controls. ( <i>p</i> < 0.025) | Beta-carotene is converted to vitamin A, a potent antioxidant. |

**Supplementary Table S30. Summary of results of calendula as an intervention.**

| AUTHOR, YEAR             | STUDY TYPE | POPULATION                           | INTERVENTION                                               | COMPARATOR                         | OUTCOME                                                                                                                   | EFFECT OBSERVED                                                     | MECHANISM OF ACTION                                            |
|--------------------------|------------|--------------------------------------|------------------------------------------------------------|------------------------------------|---------------------------------------------------------------------------------------------------------------------------|---------------------------------------------------------------------|----------------------------------------------------------------|
| Babaei et al., 2013 [97] | RCT        | H&N cancer patients<br><i>N</i> = 40 | Calendula officinalis flower mouthwash 2%<br><i>N</i> = 20 | Placebo mouthwash<br><i>N</i> = 20 | Antioxidant capacity using Ferric reducing antioxidant power assay and oropharyngeal mucositis intensity using OMAS scale | Lower OMAS in intervention compared to placebo ( <i>p</i> = 0.031). | Radical scavenging (hydroxyl groups), free radical terminators |
